# Supplementary material for: Self-absorption-free excited-state intramolecular proton transfer (ESIPT) emitters for high brightness and luminous efficiency organic fluorescent electroluminescent devices
Source: Royal Society of Chemistry journal article supplement (doi:10.1039/d1qm00455g), 2021-01-01
Supplement: d1qm00455g1.pdf [file d1qm00455g1.pdf]

# Supporting Information

## Self-absorption-free excited-state intramolecular proton transfer (ESIPT) emitters for high brightness and luminous efficiency organic fluorescent electroluminescent devices

Jakkapan Kumsampao,<sup>a</sup> Chaiyon Chaiwai,<sup>a</sup> Chattarika Sukpattanacharoen,<sup>b</sup> Thanyarat Chawanpunyawat,<sup>a</sup> Phattananawee Nalaoh,<sup>a</sup> Pongsakorn Chasing,<sup>a</sup> Nawee Kungwan,<sup>b</sup> Taweesak Sudyoadsuka and Vinich Promarak<sup>\*a,c</sup>

<sup>a</sup> Department of Materials Science and Engineering, School of Molecular Science and Engineering, Vidyasirimedhi Institute of Science and Technology, Wangchan, Rayong 21210, Thailand.

E-mail: [vinich.p@vistec.ac.th](mailto:vinich.p@vistec.ac.th)

<sup>b</sup> Department of Chemistry, Faculty of Science and Center of Excellence in Materials Science and Technology, Chiang Mai University, Muang, Chiang Mai 50200, Thailand

<sup>c</sup> Research Network of NANOTEC-VISTEC on Nanotechnology for Energy, Vidyasirimedhi Institute of Science and Technology, Wangchan, Rayong, 21210, Thailand

### 1. Materials synthesis

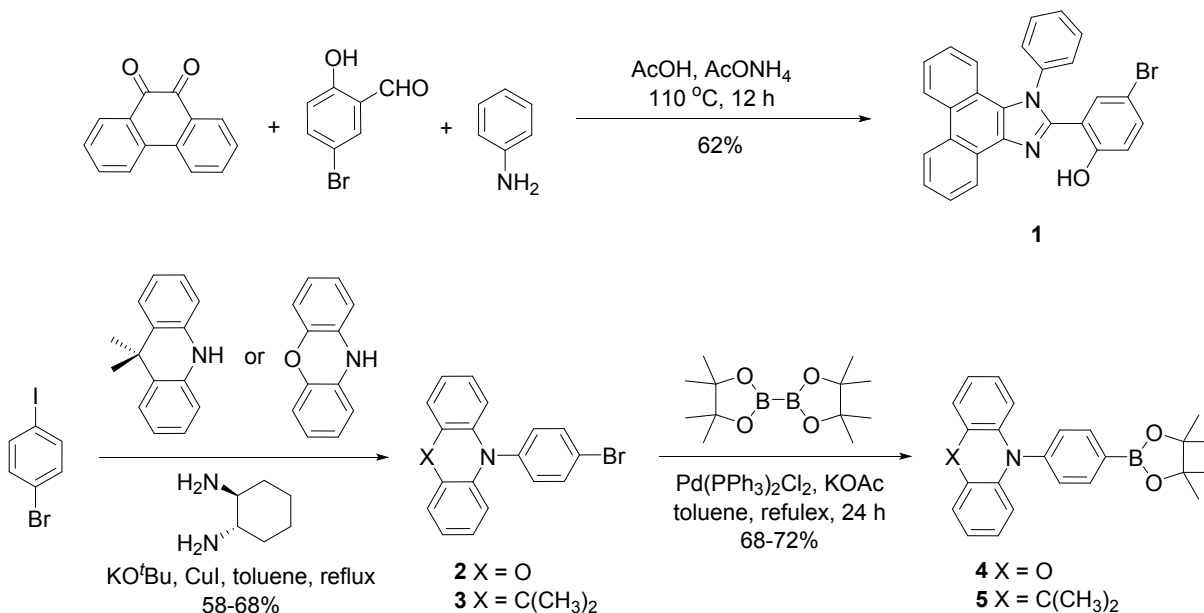

**Scheme S1** Synthesis of bromo phenanthroimidazole and phenyl-dioxaborolane intermediates.

**Synthesis of 4-bromo-2-(1-phenyl-1H-phenanthro[9,10-d]imidazol-2-yl)phenol (1).** A mixture of phenanthrene-9,10-dione **1** (2.00 g, 9.61 mmol) and 5-bromosalicylaldehyde **2** (1.93 g, 9.60 mmol) was dissolved in glacial acetic acid (48 mL) at room temperature. Then, aniline **3** (1.3 mL) was added

dropwise into the solution, and ammonium acetate (3.66 g, 47.48 mmol) was subsequently added. The mixture was heated at 110 °C for 12 h. After the termination of the reaction, the dark solution poured into a copious amount of cool water. After that, the acid solution was neutralized by Na<sub>2</sub>HCO<sub>3</sub> solution. The solid residue was filtrated from the solution by Büchner filtration, dissolved in CH<sub>2</sub>Cl<sub>2</sub> (300 mL), and washed with water (3 × 200 mL). The organic layer was combined, washed with water (3 × 100 mL), brine solution, and dried with anhydrous Na<sub>2</sub>SO<sub>4</sub>. The solvent was evaporated, and the crude product was purified by silica gel column chromatography using CH<sub>2</sub>Cl<sub>2</sub>/hexane (v/v = 1/4) as eluent. The product of 4-Br-HPIC was recrystallized from a mixture of CH<sub>2</sub>Cl<sub>2</sub>/MeOH to afford a white powder with 62% yield (2.76 g, 5.93 mmol). <sup>1</sup>H NMR (600 MHz, CDCl<sub>3</sub>) δ (ppm): 13.92 (s, 1H), 8.77 (d, *J* = 8.3 Hz, 1H), 8.72 – 8.68 (m, 2H), 7.83 (t, *J* = 7.5 Hz, 1H), 7.79 – 7.75 (m, 3H), 7.69 (t, *J* = 7.2 Hz, 1H), 7.63 (d, *J* = 7.6 Hz, 2H), 7.54 (t, *J* = 8.2 Hz, 1H), 7.28 – 7.26 (m, 2H), 7.13 (d, *J* = 8.3 Hz, 1H), 7.01 (d, *J* = 8.7 Hz, 1H), 6.74 (d, *J* = 2.3 Hz, 1H). <sup>13</sup>C NMR (151 MHz, CDCl<sub>3</sub>) δ (ppm): 158.3, 147.1, 138.6, 134.4, 133.2, 133.1, 131.0, 129.7, 128.9, 128.7, 128.6, 127.6, 127.2, 126.6, 126.3, 125.7, 125.6, 124.2, 123.3, 122.6, 122.5, 121.0, 119.7, 114.6, 109.7. APCI Q-ToF MS: *m/z* [M]<sup>+</sup> calcd for C<sub>27</sub>H<sub>17</sub>BrN<sub>2</sub>O: 464.0524, found: 465.0624.

**Synthesis of 10-(4-bromophenyl)-10H-phenoxazine (2).** A mixture of 10H-phenoxazine (1.00 g, 5.46 mmol), 1-bromo-4-iodobenzene (3.09 g, 10.92 mmol), CuI (1.04 g, 5.46 mmol), and KO<sup>t</sup>Bu (1.53 g, 13.65 mmol) was dissolved in toluene (30 mL) under nitrogen atmosphere for 10 minutes followed by addition of (±)-*trans*-1,2-cyclohexanediamine (0.7 mL). The reaction mixture was stirred and heated at 110 °C for 24 hours. The reaction was then cool down to room temperature, and the toluene was evaporated under reduced pressure and then the residue dissolved in CH<sub>2</sub>Cl<sub>2</sub> (200 mL). The organic phase was washed with water (3 × 100 mL), brine solution, and dried with anhydrous Na<sub>2</sub>SO<sub>4</sub>. After the solvent was removed under pressure, the crude product was obtained and purified by column chromatography on silica gel using hexane as the eluent. The product was recrystallized from a mixture of CH<sub>2</sub>Cl<sub>2</sub>/MeOH to afford a white powder of compound **2** with 58% yield (1.07 g, 3.16 mmol). <sup>1</sup>H NMR (600 MHz, CDCl<sub>3</sub>) δ (ppm): 8.30 (d, *J* = 8.2 Hz, 2H), 7.81 (m, 2H), 7.27 – 7.16 (m, 6H), 6.49 (d, *J* = 7.7 Hz, 2H). <sup>13</sup>C NMR (151 MHz, CDCl<sub>3</sub>) δ (ppm): 144.0, 134.4, 134.0, 132.8, 123.3, 122.4, 121.6, 115.6, 113.2. APCI Q-ToF MS: *m/z* [M]<sup>+</sup> calcd for C<sub>18</sub>H<sub>12</sub>BrNO: 337.0102, found: 337.9757.

**Synthesis of 10-(4-bromophenyl)-9,9-dimethyl-9,10-dihydroacridine (3).** A similar procedure to the preparation of compound **2** was employed but using 9,9-dimethyl-9,10-dihydroacridine (1.00, 4.78 mmol) instead of 10H-phenoxazine. A white powder of compound **3** was obtained with 68% yield (1.18 g, 3.24 mmol). <sup>1</sup>H NMR (600 MHz, CDCl<sub>3</sub>) δ (ppm): 7.76 (d, *J* = 8.2 Hz, 2H), 7.46 (d, *J* = 7.6 Hz, 2H), 7.23 (d, *J* = 8.2 Hz, 2H), 6.99 – 6.92 (m, 4H), 6.25 (d, *J* = 8.0 Hz, 2H), 1.68 (s, 6H). <sup>13</sup>C NMR (151 MHz, CDCl<sub>3</sub>) δ (ppm): 140.6, 140.4, 134.2, 133.2, 130.1, 126.4, 125.3, 122.1, 120.8, 113.9, 36.0, 31.2. APCI Q-ToF MS: *m/z* [M]<sup>+</sup> calcd for C<sub>21</sub>H<sub>18</sub>BrN: 363.0623, found: 364.0187.

**Synthesis of 4-(10H-Phenoxazine-10-yl)phenyl-dioxaborolane (4).** A mixture of bromophenyl compound **2** (1.00 g, 2.96 mmol), bis(pinacolato)diboron (2.10 g, 8.30 mmol), Pd(PPh<sub>3</sub>)<sub>2</sub>Cl<sub>2</sub> (0.10 g, 0.14 mmol) and KOAc (3.57 g, 36.38 mmol) was dissolved in toluene (30 mL) under nitrogen atmosphere for 10 minutes. The mixture was stirred and heated at 110 °C for 24 hours. The reaction mixture was then

cool down to room temperature, and the toluene was evaporated under reduced pressure and then the residue dissolved in CH<sub>2</sub>Cl<sub>2</sub> (200 mL). The organic phase was washed with water (3 × 100 mL), brine solution, and dried with anhydrous Na<sub>2</sub>SO<sub>4</sub>. After the solvent was removed under pressure, the crude product was obtained and purified by column chromatography on silica gel using CH<sub>2</sub>Cl<sub>2</sub>/hexane (v/v = 1/5) as the eluent. The borolane product was recrystallized from a mixture of CH<sub>2</sub>Cl<sub>2</sub>/MeOH to afford a white powder of compound **4** with 68% yield (0.78 g, 2.03 mmol). <sup>1</sup>H NMR (600 MHz, acetone-d<sub>6</sub>, δ) 7.28 (d, *J* = 8.0 Hz, 2H), 6.67 (d, *J* = 8.0 Hz, 2H), 5.96 – 5.87 (m, 6H), 5.18 (d, *J* = 8.9 Hz, 2H), 0.63 (s, 12H). <sup>13</sup>C NMR (151 MHz, acetone-d<sub>6</sub>, δ) 143.8, 137.4, 134.2, 130.0, 123.5, 121.5, 115.3, 113.4, 84.0, 24.3. APCI Q-ToF MS: *m/z* [M]<sup>+</sup> calcd for C<sub>24</sub>H<sub>24</sub>BNO<sub>3</sub>: 385.1849, found: 386.1745.

**Synthesis of 4-(9,9-Dimethyl-9,10-dihydroacridin-10(9H)-yl)phenyl-dioxaborolane (5).** A similar procedure to the preparation of compound **4** was employed but using bromophenyl compound **3** (1.00, 2.75 mmol) instead of bromophenyl compound **2**. A white powder compound **5** was obtained with 72% yield (0.81 g, 1.97 mmol). <sup>1</sup>H NMR (600 MHz, CDCl<sub>3</sub>, δ) 8.07 (d, *J* = 8.0 Hz, 2H), 7.45 (d, *J* = 7.6 Hz, 2H), 7.35 (d, *J* = 8.0 Hz, 2H), 6.95 – 6.89 (m, 4H), 6.25 (d, *J* = 8.0 Hz, 2H), 1.69 (s, 6H), 1.40 (s, 12H). <sup>13</sup>C NMR (151 MHz, CDCl<sub>3</sub>, δ) 144.0, 140.7, 137.3, 130.6, 130.0, 126.3, 125.2, 120.5, 114.1, 84.1, 36.0, 31.3, 24.9. APCI Q-ToF MS: *m/z* [M]<sup>+</sup> calcd for C<sub>27</sub>H<sub>30</sub>BNO<sub>2</sub>: 411.2370, found: 412.2154.

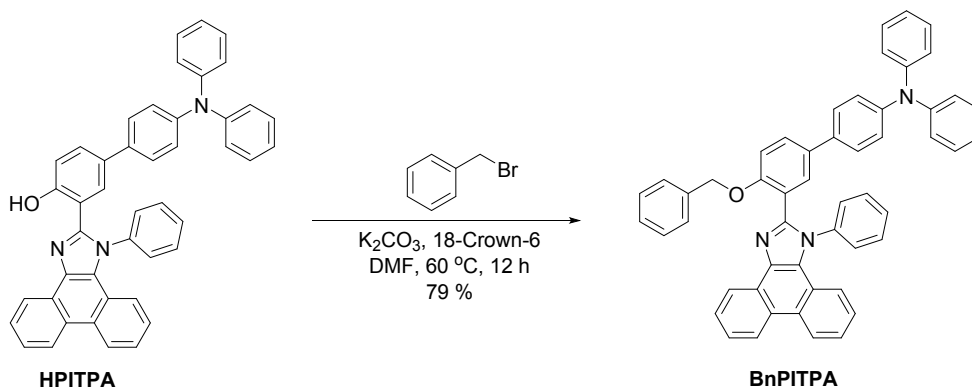

**Synthesis of BnPITPA.** A mixture of **HPITPA** (30 mg, 0.05 mmol), benzyl bromide (0.1 mL, 0.8 mmol), K<sub>2</sub>CO<sub>3</sub> (14 mg, 0.1 mmol) and 18-crown-6 was dissolved in anhydrous DMF (5 mL) and degassed under nitrogen for 10 min at room temperature. Then, the mixture was heated at 60 °C and stirred continuously for 12 hours. The reaction was then cool down to room temperature, and the DMF was evaporated under reduced pressure and then the residue dissolved in CH<sub>2</sub>Cl<sub>2</sub> (30 mL). The organic phase was washed with water (3 × 20 mL) and brine solution and dried over anhydrous Na<sub>2</sub>SO<sub>4</sub>. After the solvent was removed under pressure, the crude product was obtained and purified by column chromatography on silica gel using CH<sub>2</sub>Cl<sub>2</sub>/hexane (v/v = 1/1) as the eluent. The product was recrystallized from a mixture of CH<sub>2</sub>Cl<sub>2</sub>/hexane to afford a white powder of **BnPITPA** with 79% yield (0.027 g, 0.02 mmol). <sup>1</sup>H NMR (600 MHz, CDCl<sub>3</sub>) δ (ppm): 8.90 (d, *J* = 7.9 Hz, 1H), 8.78 (d, *J* = 8.4 Hz, 1H), 8.73 (d, *J* = 8.3 Hz, 1H), 7.76 – 7.73 (m, 2H), 7.66 (t, *J* = 7.3 Hz, 1H), 7.51 – 7.49 (m, 2H), 7.45 (t, *J* = 7.3 Hz, 1H), 7.41 – 7.32 (m, 6H), 7.25 – 7.20 (m, 11H), 7.10 (m, 6H), 7.02 (t, *J* = 7.3 Hz, 2H), 6.85 (d, *J* = 8.7 Hz, 1H), 4.92 (s, 2H); APCI Q-ToF MS: *m/z* [M]<sup>+</sup> calcd for C<sub>52</sub>H<sub>37</sub>N<sub>3</sub>O: 719.2937, found: 720.2615.

**Fig. S1** Copies of  $^1\text{H}$  and  $^{13}\text{C}$  NMR spectra and HRMS mass spectra.

$^1\text{H}$  NMR spectra of **1**

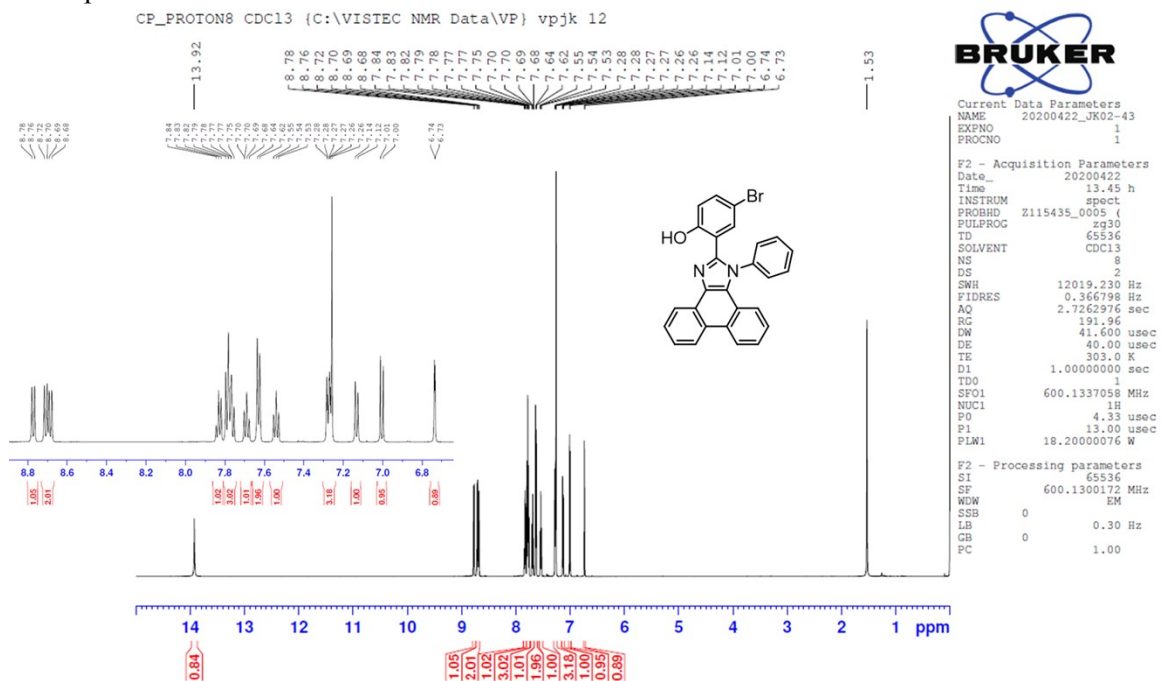

$^{13}\text{C}$  NMR spectra of **1**

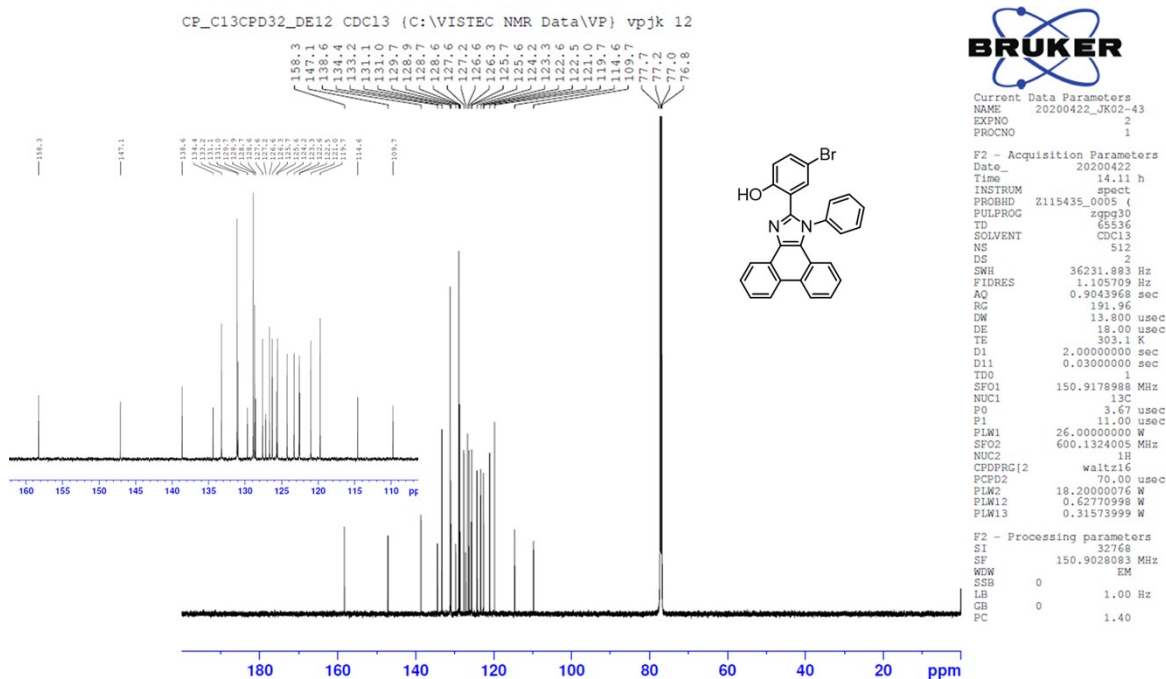

# <sup>1</sup>H NMR spectra of 2

JK-U1-61 CDCl<sub>3</sub>

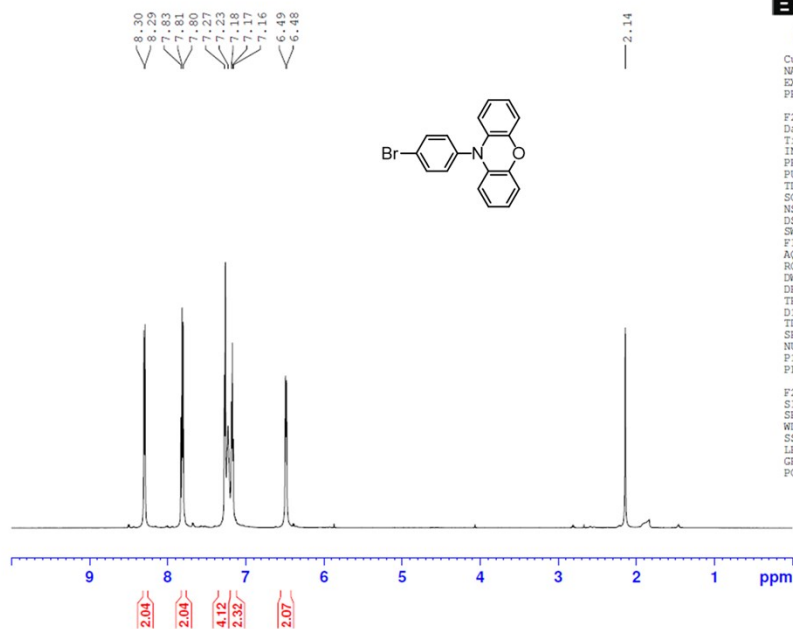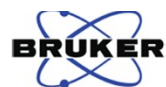

```
Current Data Parameters
NAME JK-01-61
EXPNO 3
PROCNO 1

F2 - Acquisition Parameters
Date_ 20170424
Time 20.55 h
INSTRUM spect
PROBHD Z114607_0208 (
PULPROG zg30
TD 64902
SOLVENT CDCl3
NS 8
DS 2
SWH 12019.230 Hz
FIDRES 0.370381 Hz
AQ 2.6999233 sec
RG 107.65
DW 41.600 usec
DE 6.50 usec
TE 303.1 K
D1 2.0000000 sec
TD0 1
SFO1 600.1336008 MHz
NUC1 1H
P1 10.00 usec
PLM1 23.0000000 W

F2 - Processing parameters
SI 65536
SF 600.1296735 MHz
WDW EM
SSB 0
LB 1.00 Hz
GB 0
PC 1.00
```

# <sup>13</sup>C NMR spectra of 2

JK-01-61 CDCl<sub>3</sub>

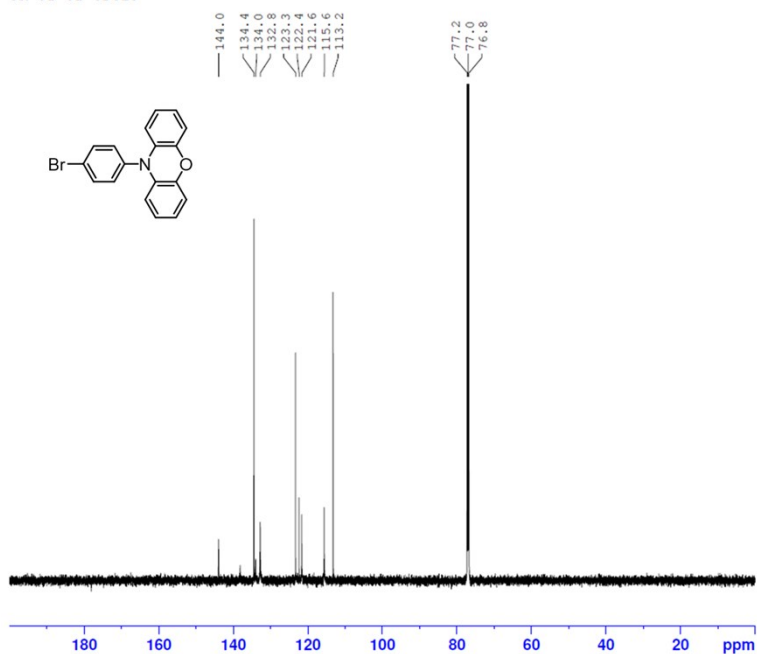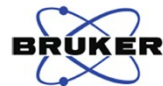

```
Current Data Parameters
NAME JK-01-61
EXPNO 4
PROCNO 1

F2 - Acquisition Parameters
Date_ 20170424
Time 21.38 h
INSTRUM spect
PROBHD Z114607_0208 (
PULPROG zgpg30
TD 65536
SOLVENT CDCl3
NS 512
DS 2
SWH 36231.883 Hz
FIDRES 1.105709 Hz
AQ 0.9043968 sec
RG 191.96
DW 13.800 usec
DE 6.50 usec
TE 303.2 K
D1 2.0000000 sec
D11 0.0300000 sec
TD0 1
SFO1 150.9178993 MHz
NUC1 13C
P1 9.70 usec
PLM1 100.6900244 W
SFO2 600.1324005 MHz
NUC2 1H
CFDPRG[2] waltz16
PCPD2 70.00 usec
PLM2 23.0000000 W
PLM12 0.4639900 W
PLM13 0.2361000 W

F2 - Processing parameters
SI 32768
SF 150.9028090 MHz
WDW EM
SSB 0
LB 1.00 Hz
GB 0
PC 1.40
```

# <sup>1</sup>H NMR spectra of 3

JK-01-80\_Re3\_F1 CDCl3

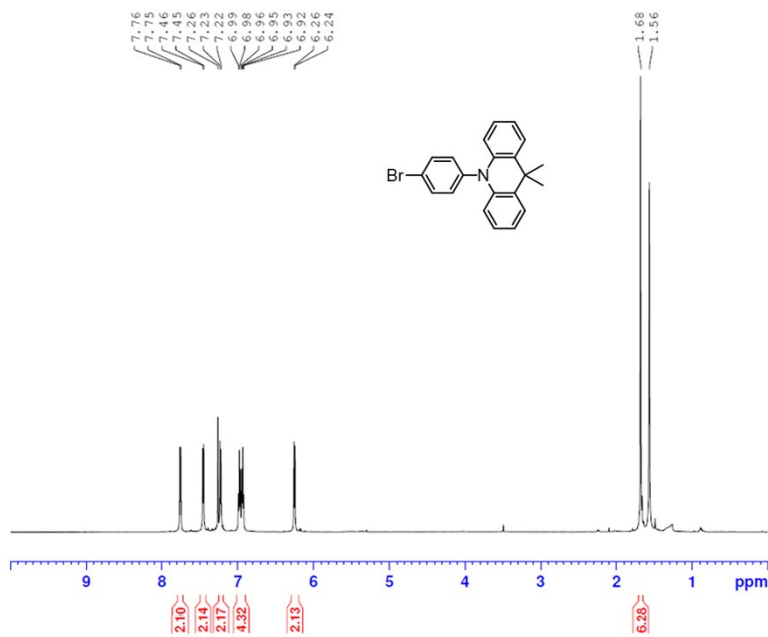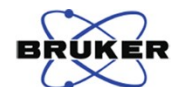

Current Data Parameters  
 NAME JK-01-80\_Re3\_F1  
 EXPNO 1  
 PROCNO 1

F2 - Acquisition Parameters  
 Date\_ 20170405  
 Time 17.53 h  
 INSTRUM spect  
 PROBHD Z114607\_0208 ( )  
 PULPROG zg30  
 TD 64902  
 SOLVENT CDCl3  
 NS 16  
 DS 2  
 SWH 12019.230 Hz  
 FIDRES 0.370381 Hz  
 AQ 2.6999233 sec  
 RG 107.65  
 DW 41.600 usec  
 DE 6.50 usec  
 TE 303.2 K  
 D1 2.0000000 sec  
 TD0 1  
 SFO1 600.1336008 MHz  
 NUC1 1H  
 P1 10.00 usec  
 PLW1 23.0000000 W

F2 - Processing parameters  
 SI 65536  
 SF 600.1300159 MHz  
 WDW EM  
 SSB 0  
 LB 1.00 Hz  
 GB 0  
 PC 1.00

# <sup>13</sup>C NMR spectra of 3

JK-01-80\_Re3\_F1 CDCl3

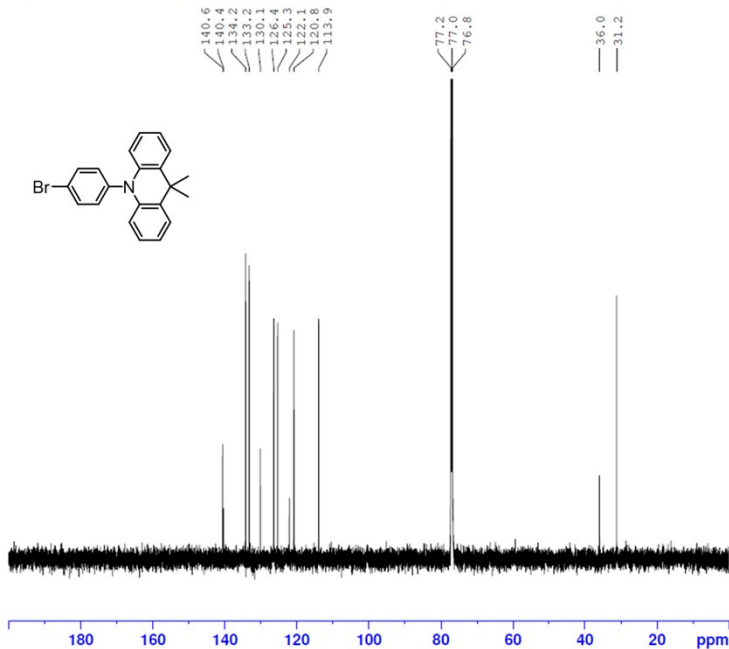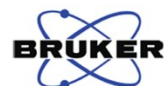

Current Data Parameters  
 NAME JK-01-80\_Re3\_F1  
 EXPNO 1  
 PROCNO 1

F2 - Acquisition Parameters  
 Date\_ 20170406  
 Time 2.24 h  
 INSTRUM spect  
 PROBHD Z114607\_0208 ( )  
 PULPROG zgpg30  
 TD 65536  
 SOLVENT CDCl3  
 NS 768  
 DS 2  
 SWH 36231.883 Hz  
 FIDRES 1.105709 Hz  
 AQ 0.9043968 sec  
 RG 191.96  
 DW 13.800 usec  
 DE 6.50 usec  
 TE 303.2 K  
 D1 2.0000000 sec  
 D11 0.0300000 sec  
 TD0 1  
 SFO1 150.9178993 MHz  
 NUC1 13C  
 P1 9.70 usec  
 PLW1 100.6900244 W  
 SFO2 600.1324005 MHz  
 NUC2 1H  
 CPDPRG[2] waltz16  
 PCDP2 70.00 usec  
 PLW2 23.0000000 W  
 PLW12 0.46939000 W  
 PLW13 0.23610000 W

F2 - Processing parameters  
 SI 32768  
 SF 150.9028090 MHz  
 WDW EM  
 SSB 0  
 LB 1.00 Hz  
 GB 0  
 PC 1.40

# <sup>1</sup>H NMR spectra of 4

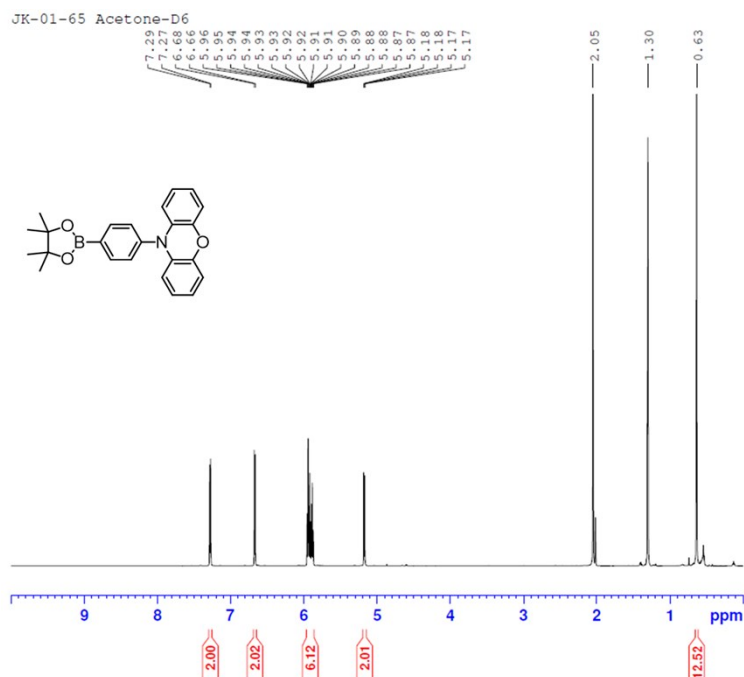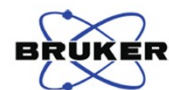

Current Data Parameters  
 NAME JK-01-65  
 EXPNO 13  
 PROCNO 1

F2 - Acquisition Parameters  
 Date\_ 20170119  
 Time 14.50 h  
 INSTRUM spect  
 PROBHD Z115435\_0005 (   
 PULPROG zg30  
 TD 65536  
 SOLVENT Acetone  
 NS 8  
 DS 2  
 SWH 12019.230 Hz  
 FIDRES 0.366798 Hz  
 AQ 2.7262976 sec  
 RG 130.93  
 DW 41.600 usec  
 DE 40.00 usec  
 TE 303.1 K  
 D1 1.00000000 sec  
 TDO 1  
 SFO1 600.1337058 MHz  
 NUC1 1H  
 P1 9.00 usec  
 PLW1 20.00000000 W

F2 - Processing parameters  
 SI 65536  
 SF 600.1304617 MHz  
 WDW EM  
 SSB 0  
 LB 0.30 Hz  
 GB 0  
 PC 1.00

# <sup>13</sup>C NMR spectra of 4

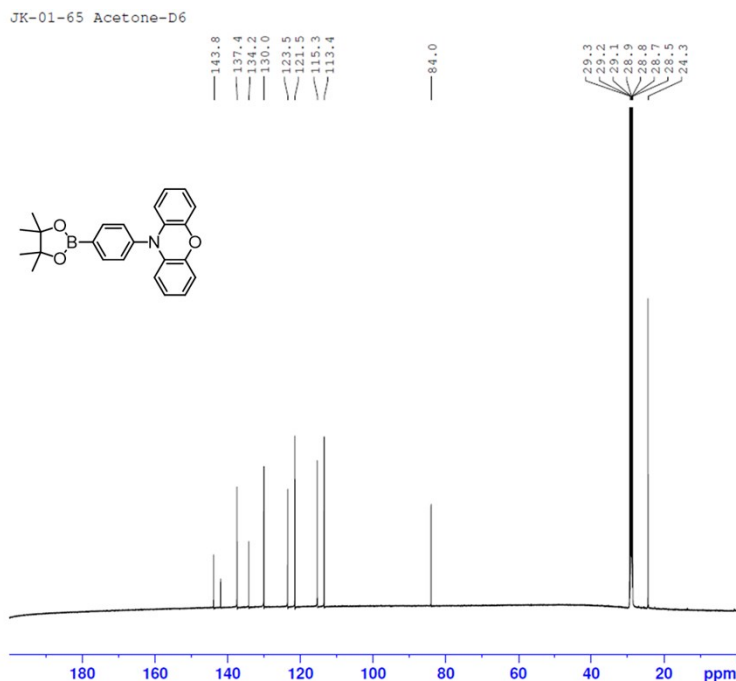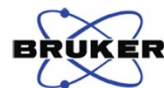

Current Data Parameters  
 NAME JK-01-65  
 EXPNO 4  
 PROCNO 1

F2 - Acquisition Parameters  
 Date\_ 20170120  
 Time 14.07 h  
 INSTRUM spect  
 PROBHD Z115435\_0005 (   
 PULPROG zgpg30  
 TD 65536  
 SOLVENT Acetone  
 NS 512  
 DS 2  
 SWH 36231.825 Hz  
 FIDRES 1.105709 Hz  
 AQ 0.9043968 sec  
 RG 191.96  
 DW 13.800 usec  
 DE 18.00 usec  
 TE 303.2 K  
 D1 2.00000000 sec  
 D11 0.03000000 sec  
 TDO 1  
 SFO1 150.9178988 MHz  
 NUC1 13C  
 P1 11.00 usec  
 PLW1 26.00000000 W  
 SFO2 600.1324005 MHz  
 NUC2 1H  
 CPDPRG2 waltz16  
 PCPD2 70.00 usec  
 PLW2 20.00000000 W  
 PLW12 0.33061001 W  
 PLW13 0.16630000 W

F2 - Processing parameters  
 SI 32768  
 SF 150.9028085 MHz  
 WDW EM  
 SSB 0  
 LB 1.00 Hz  
 GB 0  
 PC 1.40

# <sup>1</sup>H NMR spectra of 5

JK-01-88 CDCl<sub>3</sub>

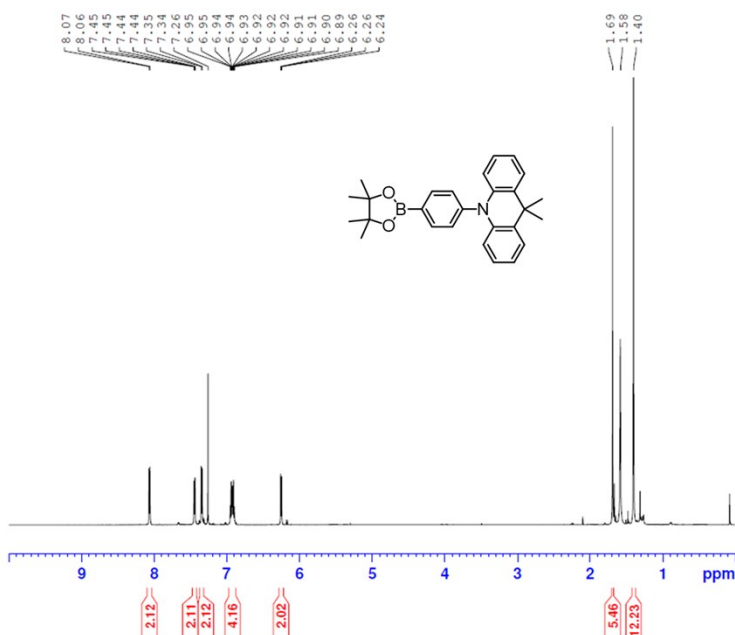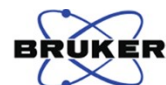

Current Data Parameters  
NAME JK-01-88  
EXPNO 1  
PROCNO 1

F2 - Acquisition Parameters  
Date\_ 20170314  
Time 18.08 h  
INSTRUM spect  
PROBHD Z114607\_0208 (4  
PULPROG zg30  
TD 64902  
SOLVENT CDCl3  
NS 16  
DS 2  
SWH 12019.230 Hz  
FIDRES 0.370381 Hz  
AQ 2.6999233 sec  
RG 116.94  
DW 41.600 usec  
DE 6.50 usec  
TE 303.1 K  
D1 2.00000000 sec  
TDO 1  
SFO1 600.1336008 MHz  
NUC1 1H  
P1 18.00 usec  
PLW1 23.00000000 W

F2 - Processing parameters  
SI 65536  
SF 600.1300152 MHz  
WDW EM  
SSB 0  
LB 1.00 Hz  
GB 0  
PC 1.00

# <sup>13</sup>C NMR spectra of 5

JK-01-88 CDCl<sub>3</sub>

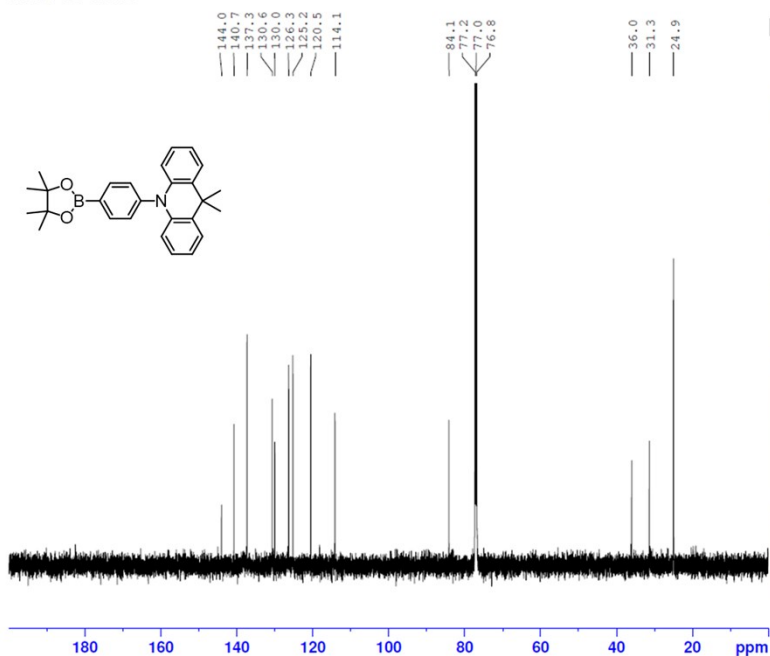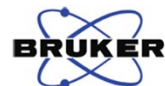

Current Data Parameters  
NAME JK-01-88  
EXPNO 2  
PROCNO 1

F2 - Acquisition Parameters  
Date\_ 20170315  
Time 5.04 h  
INSTRUM spect  
PROBHD Z114607\_0208 (4  
PULPROG zgpg30  
TD 65536  
SOLVENT CDCl3  
NS 1024  
DS 2  
SWH 36231.483 Hz  
FIDRES 1.105709 Hz  
AQ 0.9043968 sec  
RG 191.96  
DW 13.800 usec  
DE 6.50 usec  
TE 303.1 K  
D1 2.00000000 sec  
D11 0.03000000 sec  
TDO 1  
SFO1 150.9178993 MHz  
NUC1 13C  
P1 9.70 usec  
PLW1 100.69000244 W  
SFO2 600.1324005 MHz  
NUC2 1H  
CPDPRG2 waltz16  
PCPD2 70.00 usec  
PLW2 23.00000000 W  
PLW12 0.46939000 W  
PLW13 0.23610000 W

F2 - Processing parameters  
SI 32768  
SF 150.9028090 MHz  
WDW EM  
SSB 0  
LB 1.00 Hz  
GB 0  
PC 1.40



# <sup>1</sup>H NMR spectra of HPITPA

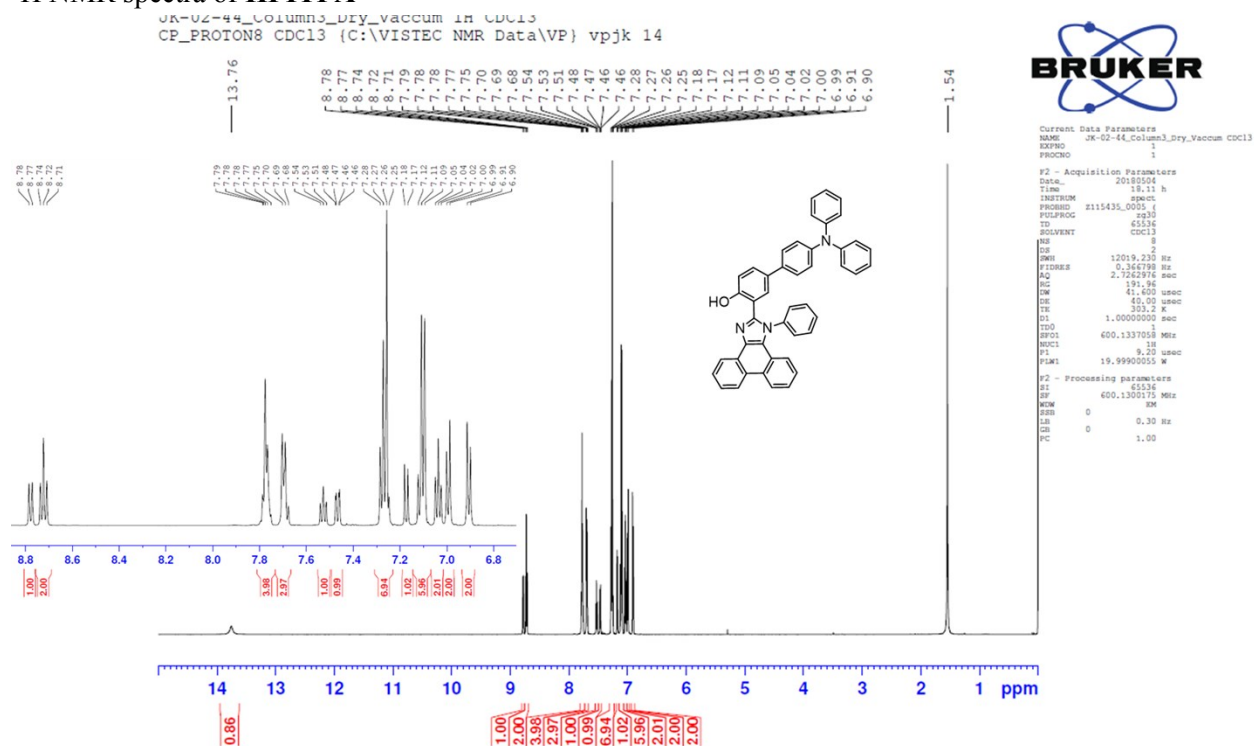

# <sup>13</sup>C NMR spectra of HPITPA

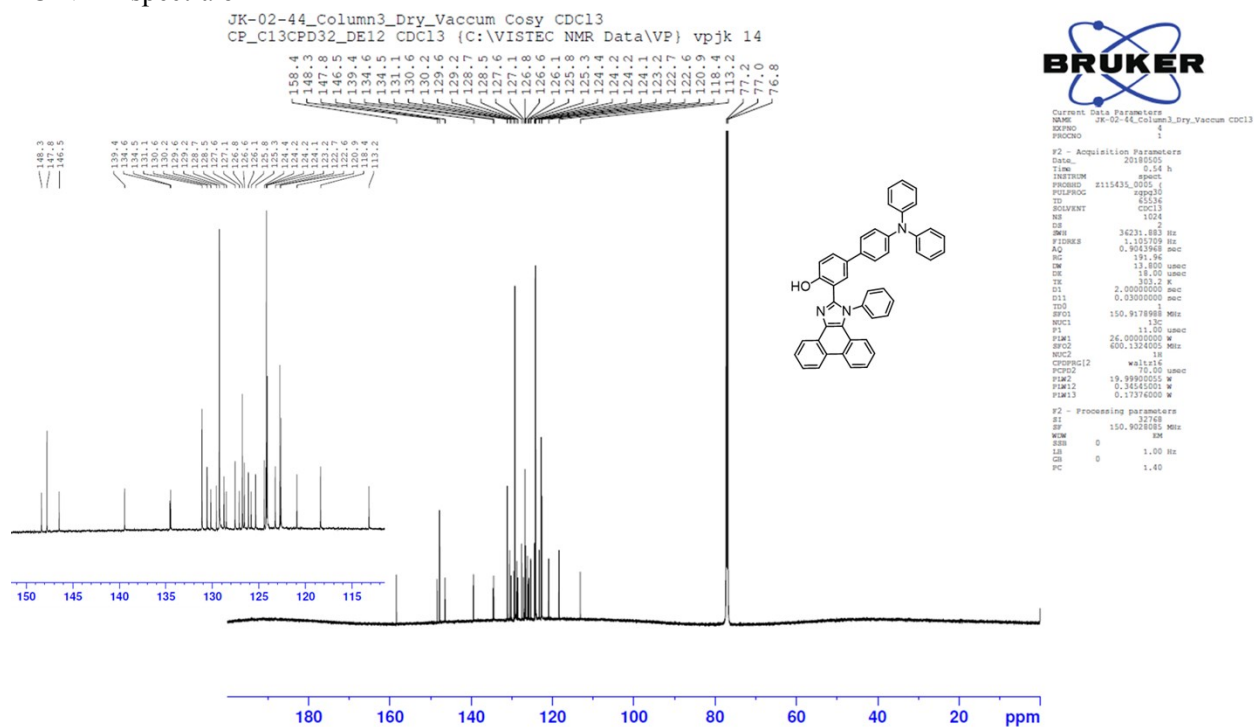

# <sup>1</sup>H NMR spectra of HPIPXX

JK-UZ-46\_Column1\_Run3 <sup>1</sup>H CDCl<sub>3</sub>  
 CP\_PROTON8 CDCl<sub>3</sub> (C:\VISTEC NMR Data\VP) vpjk 9

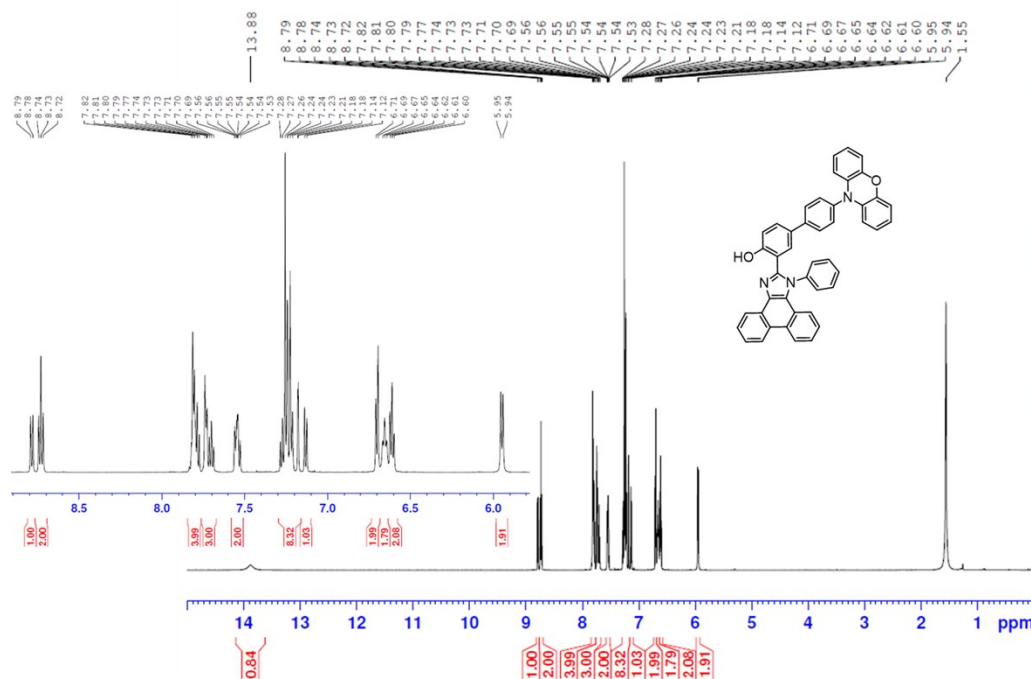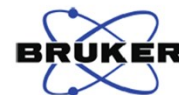

Current Data Parameters  
 NAME JK-UZ-46\_Column1\_Run3 CDCl<sub>3</sub>  
 EXPNO 1  
 PROCNO 1

F2 - Acquisition Parameters  
 Date\_ 20180521  
 Time 17.48 h  
 INSTRUM spect  
 PROBHD z115435\_0005 f  
 PULPROG zg30  
 TD 65536  
 SOLVENT cdcl3  
 NS 8  
 DS 2  
 SWH 12019.230 Hz  
 FIDRES 0.366798 Hz  
 AQ 2.7252976 sec  
 RG 191.96  
 DW 41.600 usec  
 DE 60.00 usec  
 TE 303.1 K  
 D1 1.00000000 sec  
 TDO 1  
 SFO1 600.1337058 MHz  
 NUC1 1H  
 P1 9.40 usec  
 PLW 19.99900055 W

F2 - Processing parameters  
 SI 65536  
 SF 600.1300180 MHz  
 WDW EM  
 SSB 0  
 LB 0.30 Hz  
 GB 0  
 PC 1.00

# <sup>13</sup>C NMR spectra of HPIPXX

JK-02-46\_Column1\_Run4 <sup>13</sup>C CDCl<sub>3</sub>  
 CP\_c13CPD32\_DE12 CDCl<sub>3</sub> (C:\VISTEC NMR Data\VP) vpjk 10

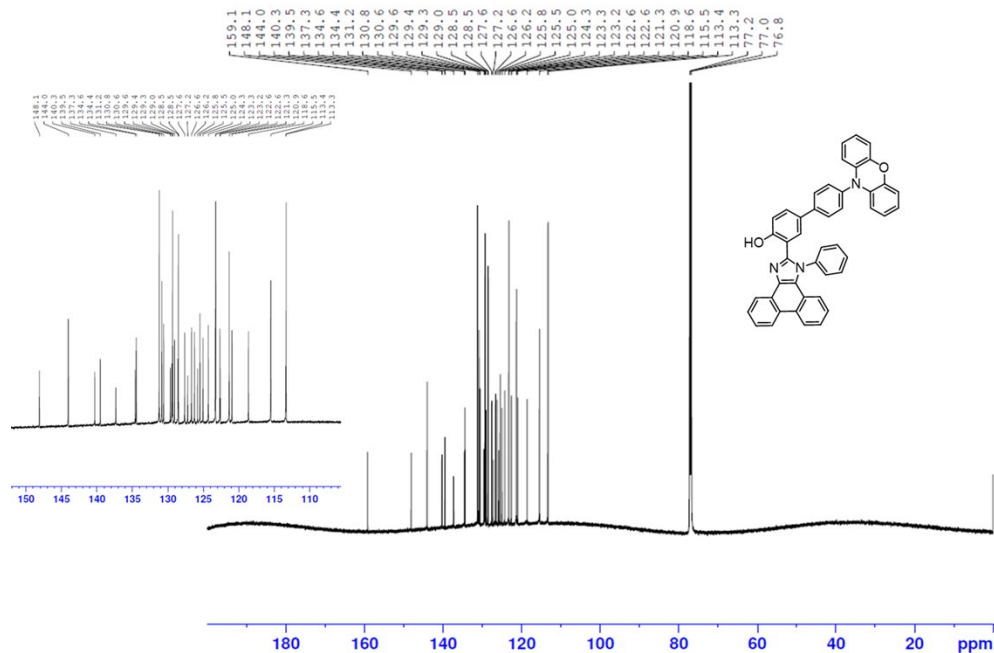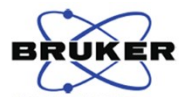

Current Data Parameters  
 NAME JK-02-46\_Column1\_Run4 <sup>13</sup>C CDCl<sub>3</sub>  
 EXPNO 1  
 PROCNO 1

F2 - Acquisition Parameters  
 Date\_ 20180521  
 Time 0.54 h  
 INSTRUM spect  
 PROBHD z115435\_0005 f  
 PULPROG zgpg30  
 TD 65536  
 SOLVENT cdcl3  
 NS 1024  
 DS 2  
 SWH 36231.883 Hz  
 FIDRES 1.105759 Hz  
 AQ 0.9043966 sec  
 RG 181.96  
 DW 13.800 usec  
 DE 15.00 usec  
 TE 303.2 K  
 D1 2.00000000 sec  
 D11 0.03000000 sec  
 TDO 1  
 SFO1 150.9178988 MHz  
 NUC1 13C  
 P1 11.00 usec  
 PLW 26.0000000 W  
 SFO2 600.1324005 MHz  
 NUC2 1H  
 CDEPRG12 wait16  
 PCFG2 15.00 usec  
 PLW2 19.99900055 W  
 PLW3 0.366798 W  
 PLW4 0.18140000 W

F2 - Processing parameters  
 SI 32768  
 SF 150.9026080 MHz  
 WDW EM  
 SSB 0  
 LB 1.00 Hz  
 GB 0  
 PC 1.40

# <sup>1</sup>H NMR spectra of HPIMAC

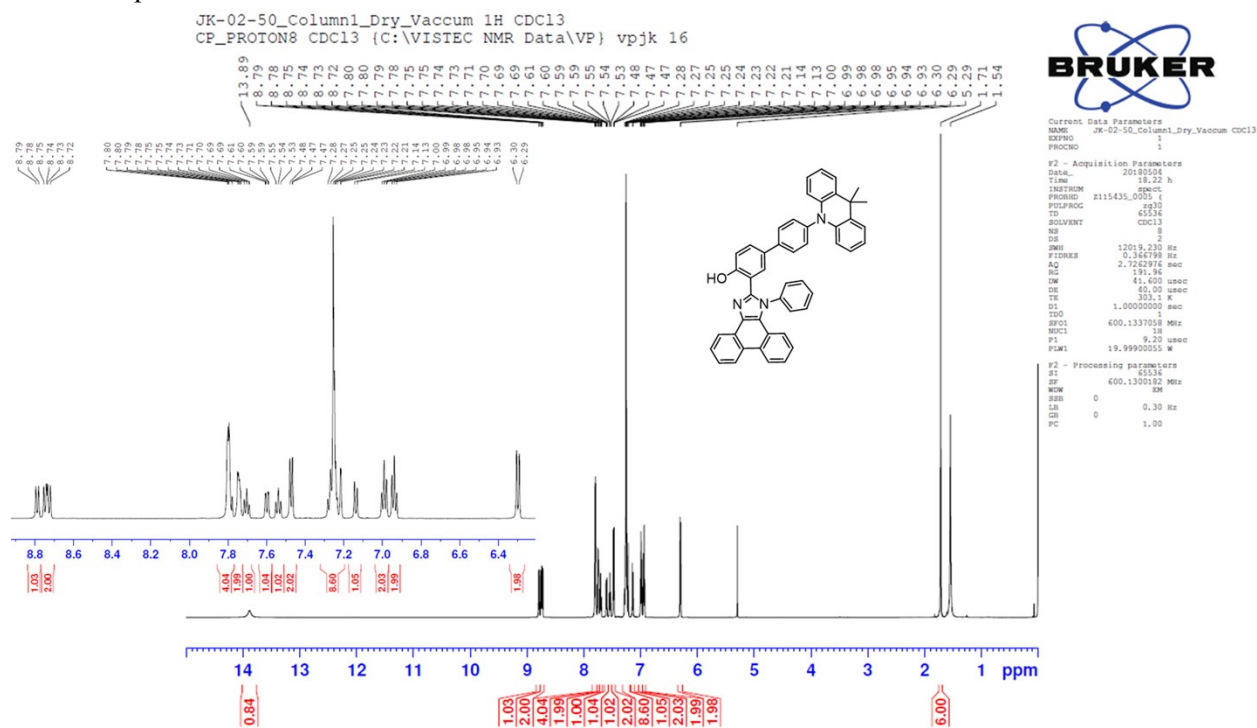

# <sup>13</sup>C NMR spectra of HPIMAC

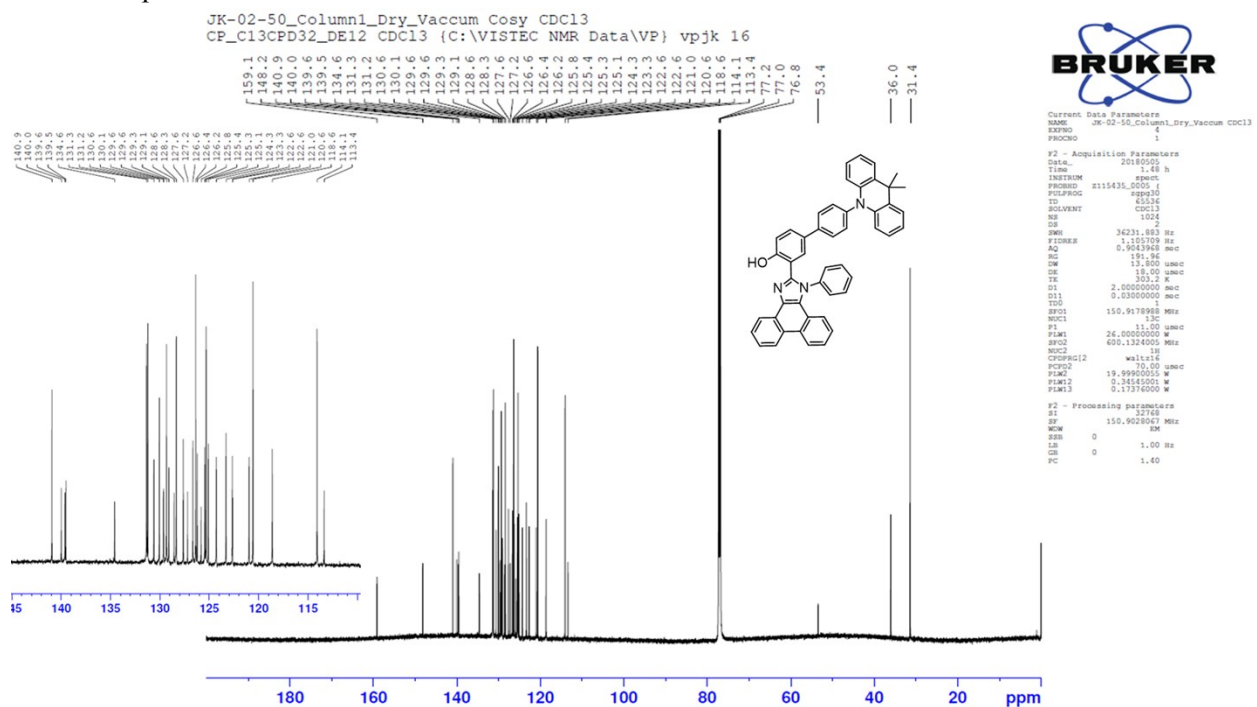

Q-ToF MS spectra of **1**

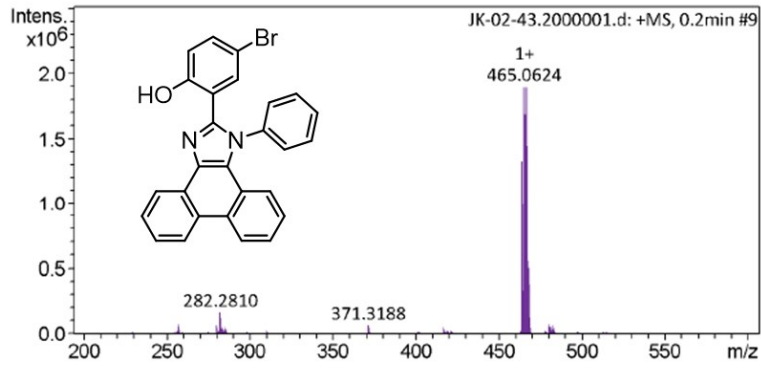

Q-ToF MS spectra of **2**

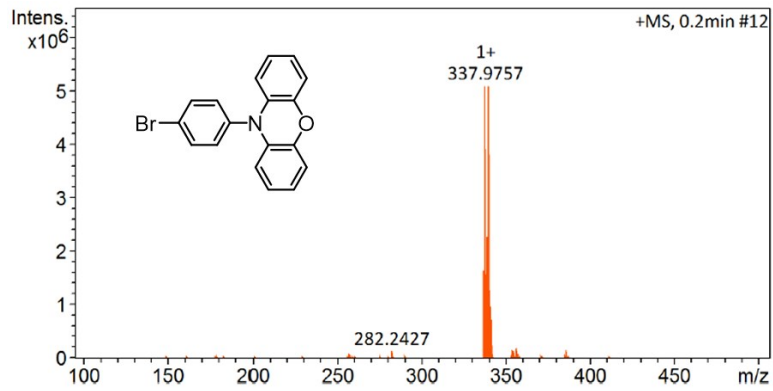

Q-ToF MS spectra of **3**

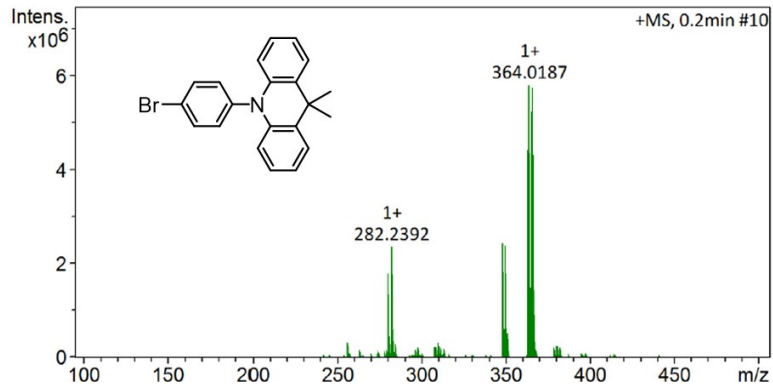

Q-ToF MS spectra of **4**

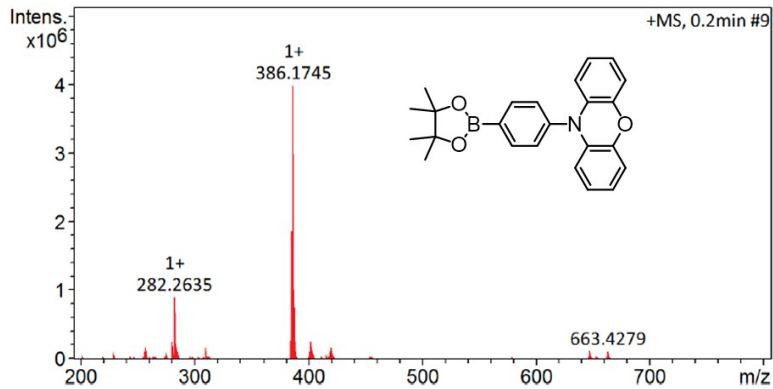

Q-ToF MS spectra of **5**

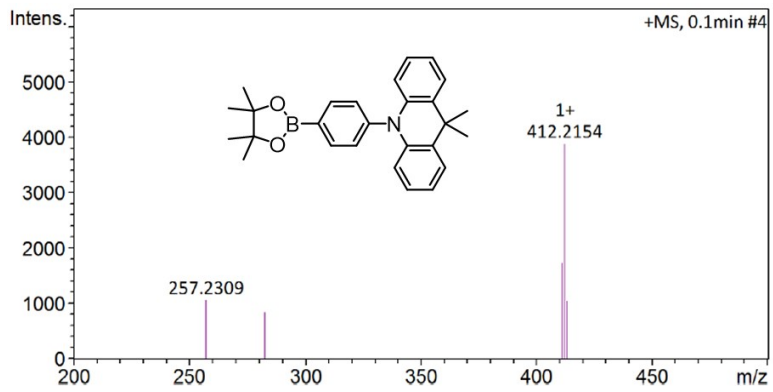

Q-ToF MS spectra of **HPITPA**

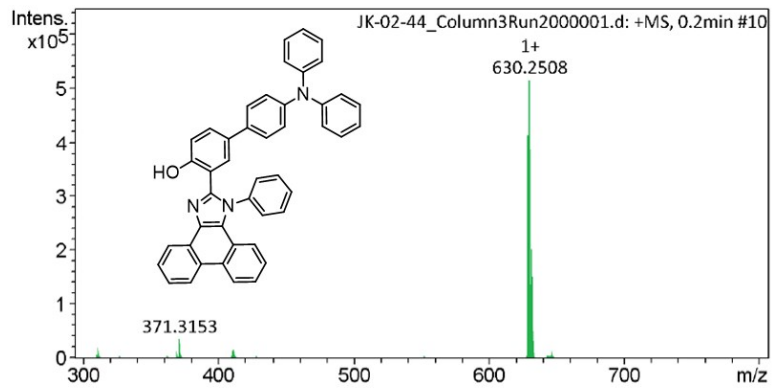

Q-ToF MS spectra of **HPIPXZ**

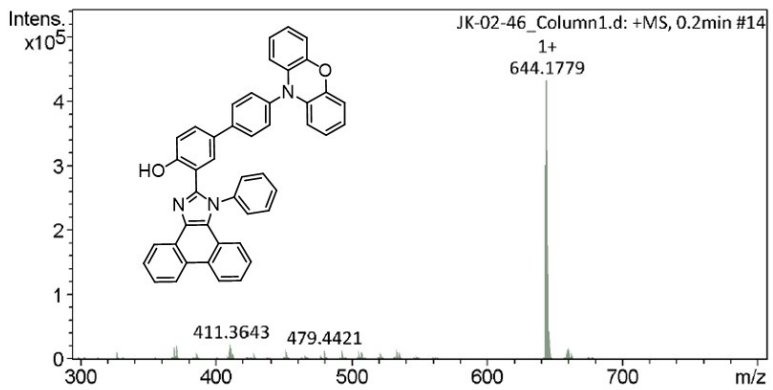

Q-ToF MS spectra of **HPIMAC**

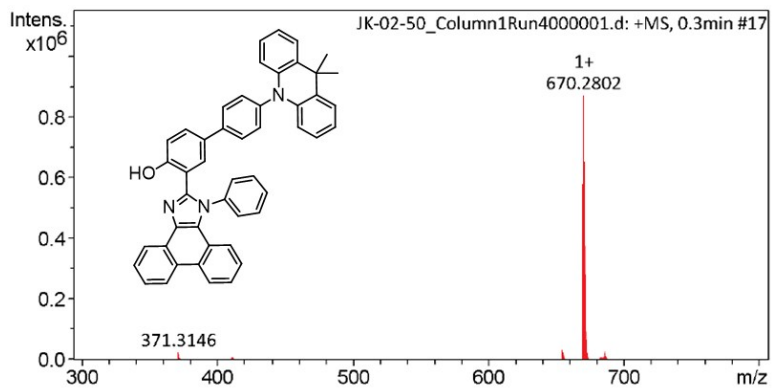

# <sup>1</sup>H NMR spectra of BnPITPA

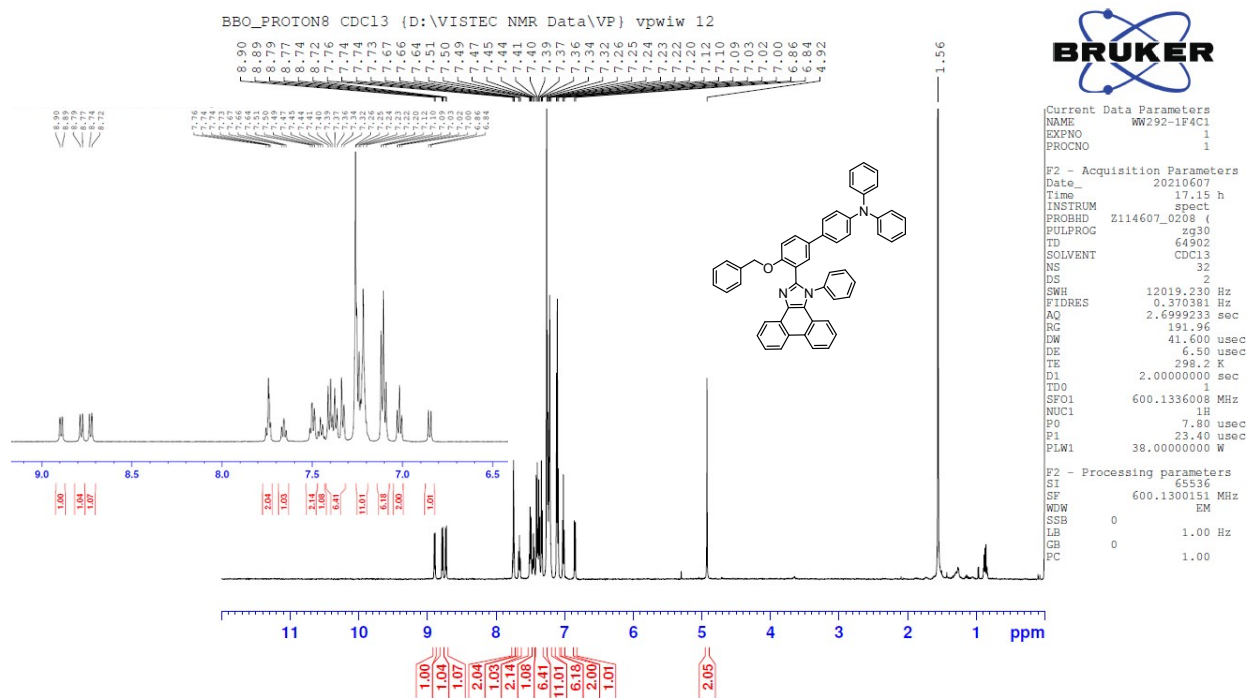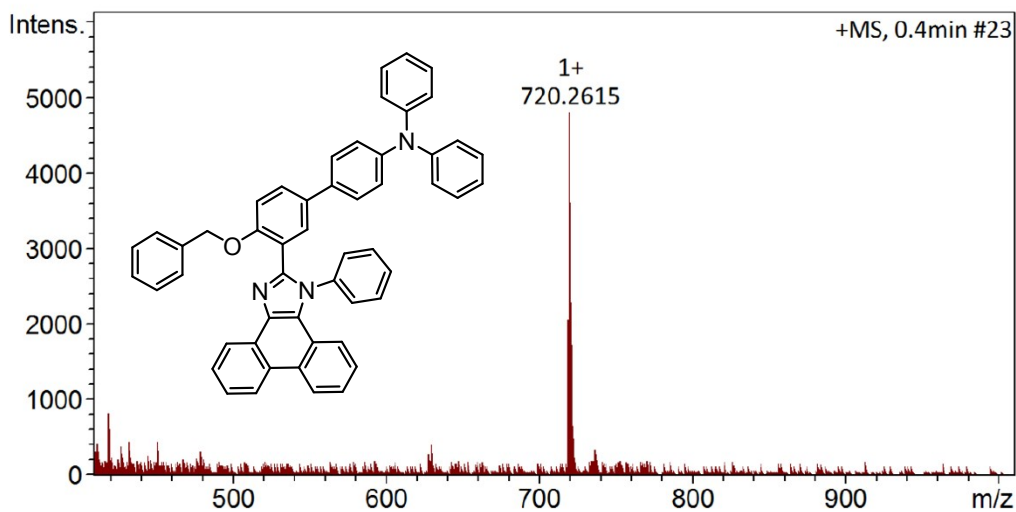

## 2. Additional data

**Table S1** Crystallographic data table of **HPITPA** and **HPIMAC**.

| Compound                                               | HPITPA                                                            | HPIMAC                                                              |
|--------------------------------------------------------|-------------------------------------------------------------------|---------------------------------------------------------------------|
| CCDC Number                                            | 2059959                                                           | 2059960                                                             |
| Empirical formula                                      | C <sub>45</sub> H <sub>31</sub> N <sub>3</sub> O                  | C <sub>48</sub> H <sub>35</sub> N <sub>3</sub> O                    |
| Formula weight                                         | 629.73                                                            | 669.79                                                              |
| Temperature/K                                          | 100.0                                                             | 100.0                                                               |
| Crystal system                                         | monoclinic                                                        | monoclinic                                                          |
| Space group                                            | <i>P</i> 2 <sub>1</sub> / <i>c</i>                                | <i>C</i> 2/ <i>c</i>                                                |
| <i>a</i> /Å                                            | 27.7570(17)                                                       | 33.637(2)                                                           |
| <i>b</i> /Å                                            | 5.7946(4)                                                         | 8.9349(5)                                                           |
| <i>c</i> /Å                                            | 20.8891(15)                                                       | 25.7018(14)                                                         |
| $\alpha$ /°                                            | 90                                                                | 90                                                                  |
| $\beta$ /°                                             | 104.659(4)                                                        | 112.158(2)                                                          |
| $\gamma$ /°                                            | 90                                                                | 90                                                                  |
| Volume/Å <sup>3</sup>                                  | 3250.5(4)                                                         | 7154.0(7)                                                           |
| <i>Z</i>                                               | 4                                                                 | 8                                                                   |
| $\rho_{\text{calc}}$ /cm <sup>3</sup>                  | 1.287                                                             | 1.244                                                               |
| $\mu$ /mm <sup>-1</sup>                                | 0.077                                                             | 0.074                                                               |
| F(000)                                                 | 1320.0                                                            | 2816.0                                                              |
| Crystal size/mm <sup>3</sup>                           | 0.631 × 0.093 × 0.064                                             | 0.654 × 0.171 × 0.063                                               |
| Radiation                                              | MoK $\alpha$ ( $\lambda$ = 0.71073)                               | MoK $\alpha$ ( $\lambda$ = 0.71073)                                 |
| 2 $\Theta$ range for data collection/°                 | 4.388 to 50.736                                                   | 4.742 to 50.698                                                     |
| Index ranges                                           | -33 ≤ <i>h</i> ≤ 33,<br>-6 ≤ <i>k</i> ≤ 6,<br>-25 ≤ <i>l</i> ≤ 24 | -40 ≤ <i>h</i> ≤ 40,<br>-10 ≤ <i>k</i> ≤ 10,<br>-30 ≤ <i>l</i> ≤ 30 |
| Reflections collected                                  | 58001                                                             | 49257                                                               |
| Independent reflections                                | 5923 [R <sub>int</sub> = 0.1051, R <sub>sigma</sub> = 0.0448]     | 6538 [R <sub>int</sub> = 0.1111, R <sub>sigma</sub> = 0.0556]       |
| Data/restraints/parameters                             | 5923/0/446                                                        | 6538/0/475                                                          |
| Goodness-of-fit on F <sup>2</sup>                      | 1.190                                                             | 1.094                                                               |
| Final R indexes [ <i>I</i> >= 2 $\sigma$ ( <i>I</i> )] | R <sub>1</sub> = 0.0784, wR <sub>2</sub> = 0.1813                 | R <sub>1</sub> = 0.0749, wR <sub>2</sub> = 0.1768                   |
| Final R indexes [all data]                             | R <sub>1</sub> = 0.1003, wR <sub>2</sub> = 0.1895                 | R <sub>1</sub> = 0.0985, wR <sub>2</sub> = 0.1882                   |

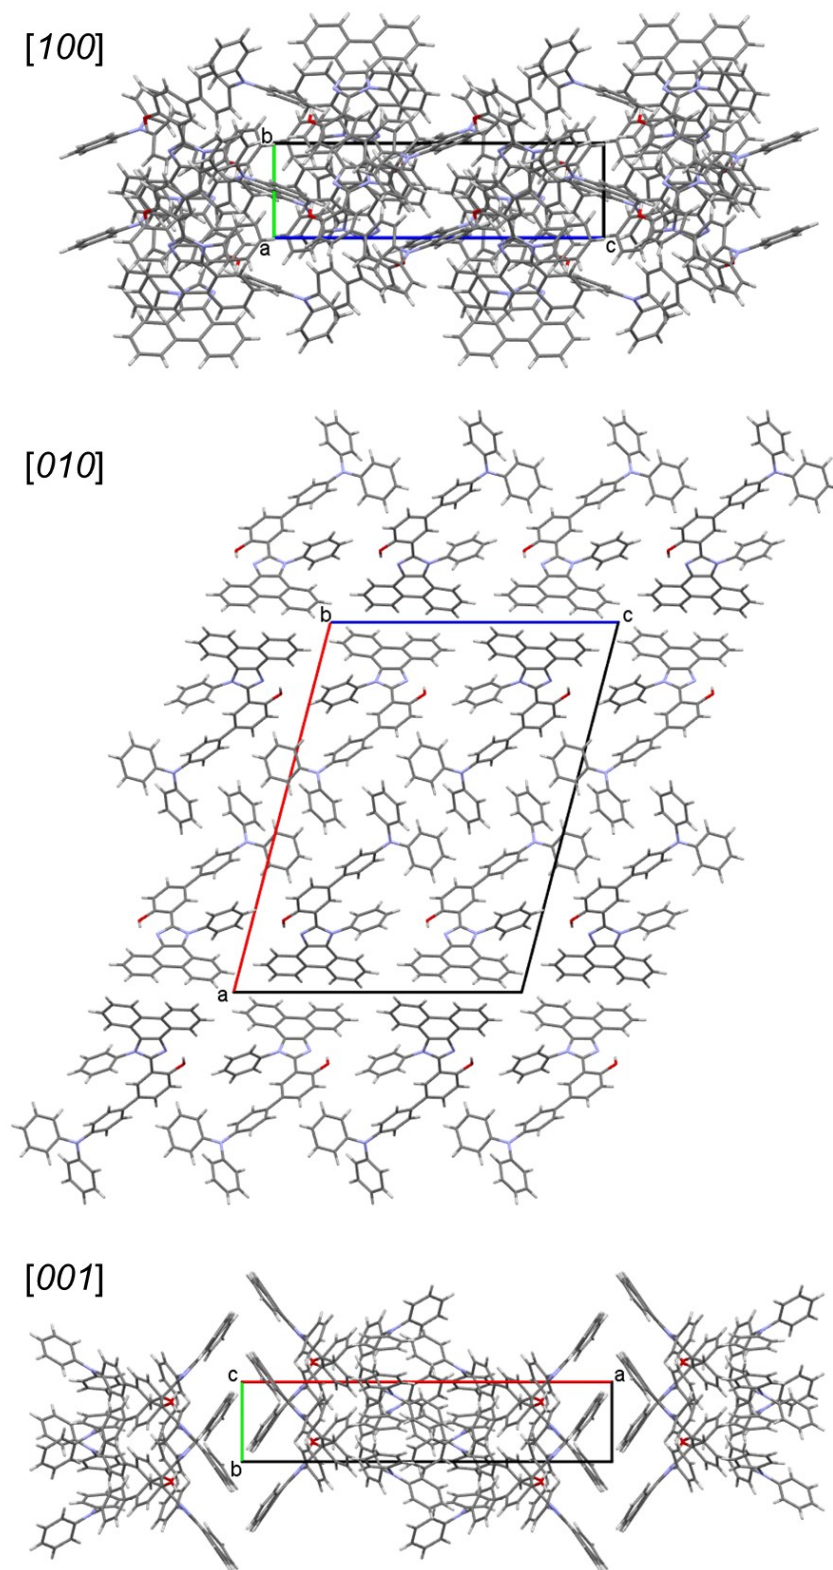

**Fig. S2** Molecular packing of **HPITPA** along  $[100]$ ,  $[010]$ , and  $[001]$  planes.



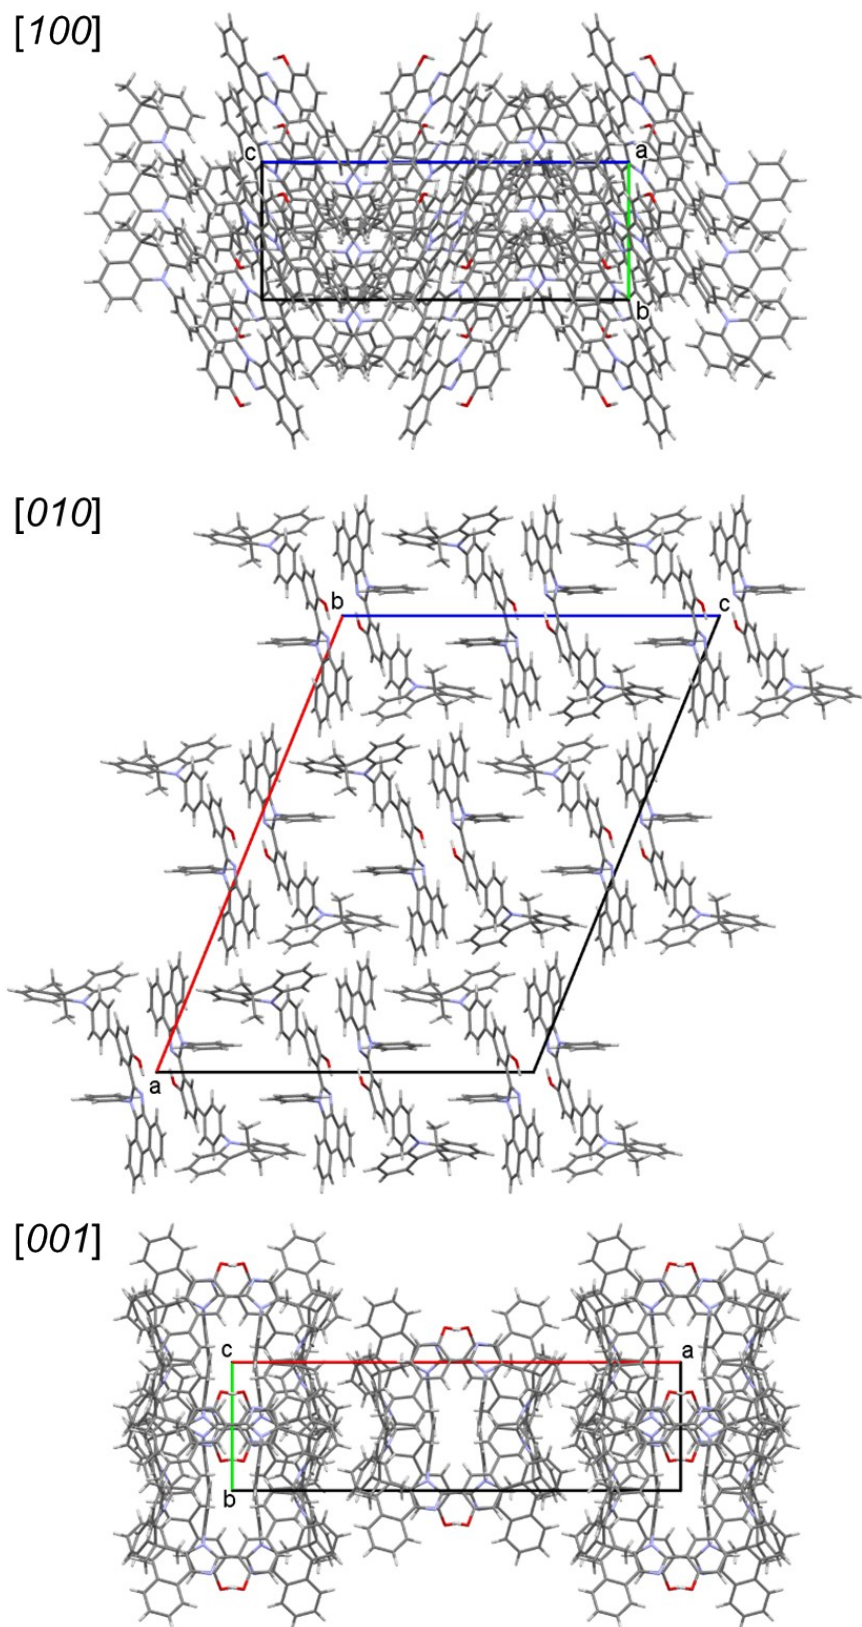

**Figure S3** Molecular packing of **HPIMAC** along  $[100]$ ,  $[010]$ , and  $[001]$  planes.

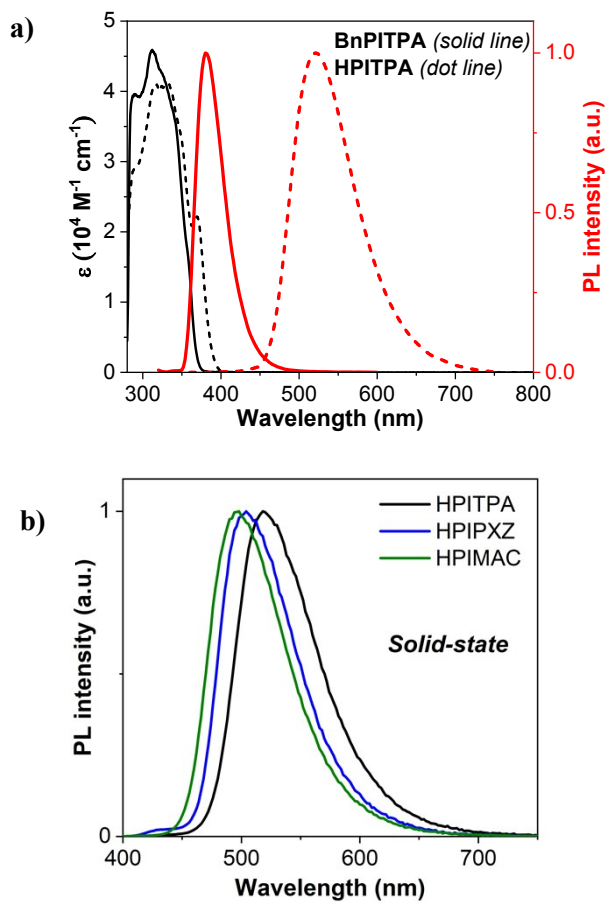

Fig. S4 PL spectra of a) **BnPITPA** and **HPITPA** in toluene and b) **HPIPXZ**, **HPIMAC**, and **HPITPA** in solid-state powder.

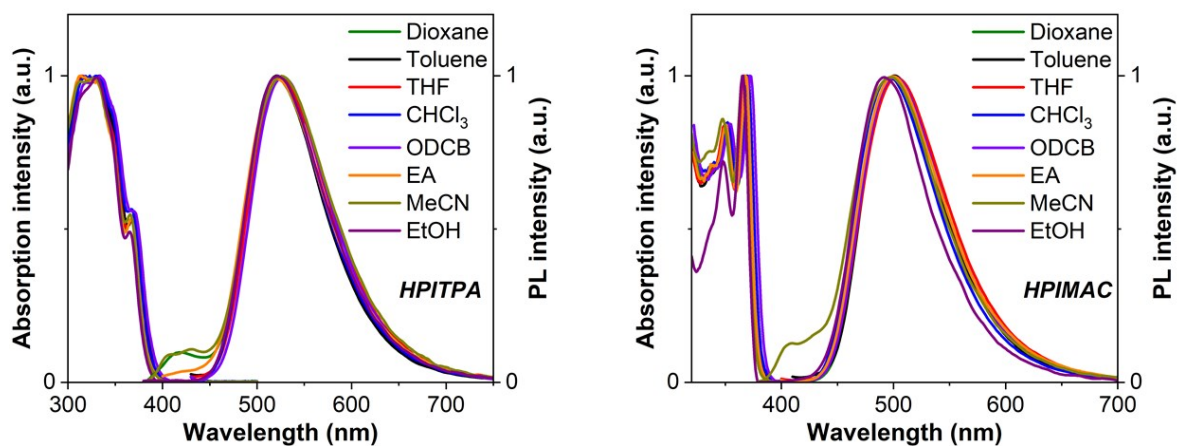

Fig. S5 UV-Vis absorption and PL spectra of **HPITPA** and **HPIMAC** in various solvents.

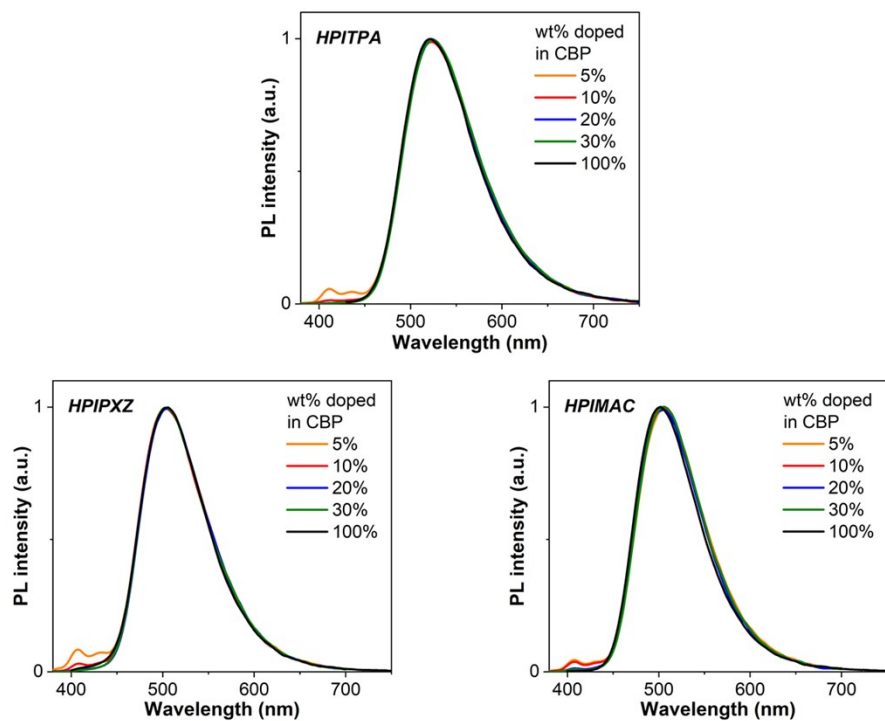

**Fig. S6** PL spectra of **HPIPXZ**, **HPIMAC**, and **HPITPA** doped thin films in CBP as host material with different doping wt% of emitting materials.

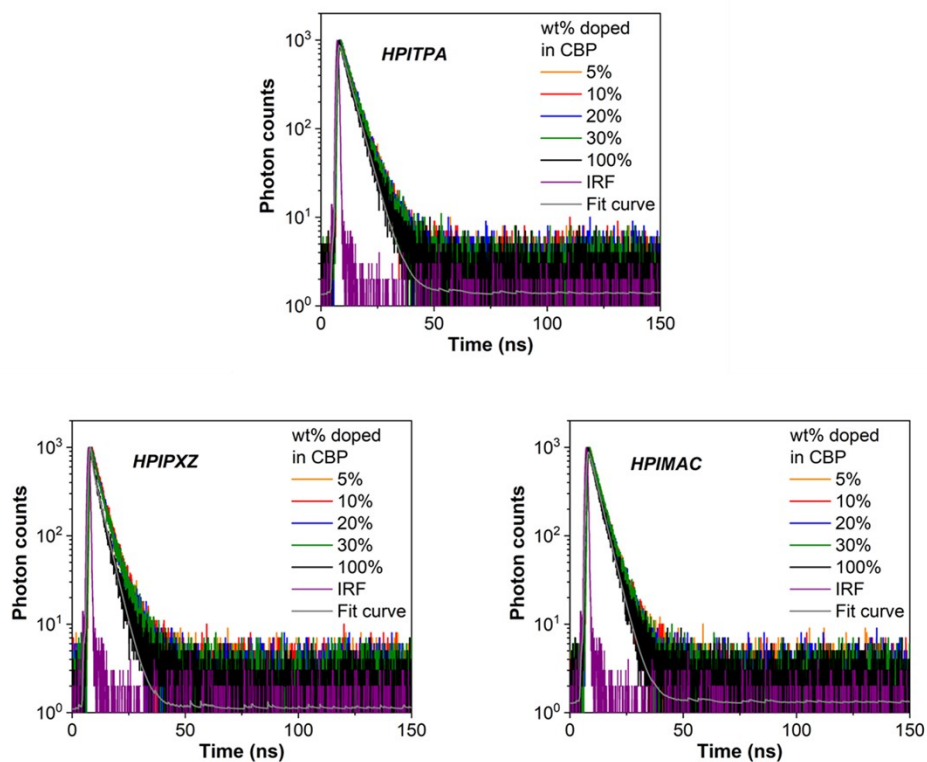

**Fig. S7** Transient PL spectra of **HPIPXZ**, **HPIMAC**, and **HPITPA** doped thin films in CBP as host material with different doping wt% of emitting materials.

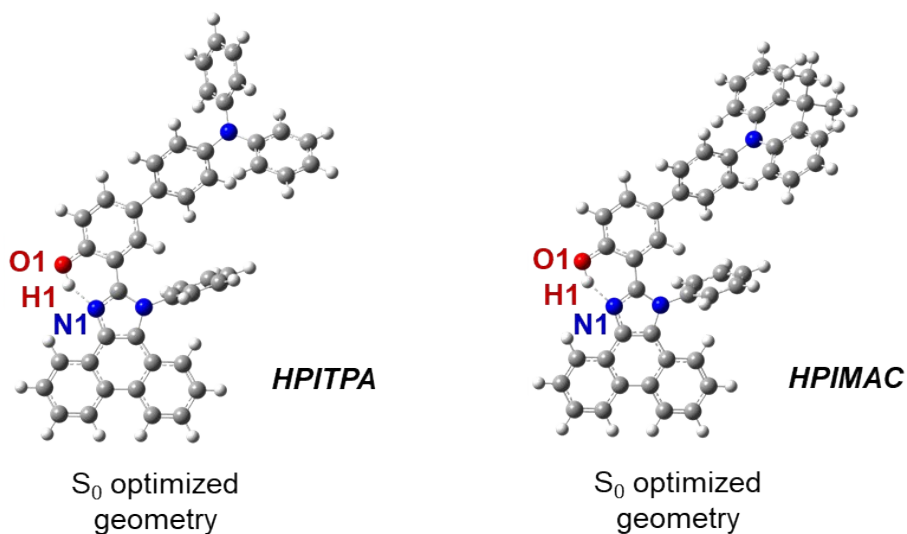

**Fig. S8** Optimized geometries of **HPITPA** and **HPIMAC** in the  $S_0$  state.

**Table S2** The vibrational frequencies of the O1–H1 stretching vibrations involved in the PT process of enol form and the relative PT barriers and computed energy differences between the enol (E) and keto tautomer (K) forms ( $\Delta E = E_{\text{keto}} - E_{\text{enol}}$ ) between the  $S_0$  and  $S_1$  states of **HPIPXZ**, **HPIMAC**, and **HPITPA** both in the  $S_0$  and  $S_1$  states computed at B3LYP/6-31G(d) level.

| Compd         | Wavenumber ( $\text{cm}^{-1}$ ) |             |                     | PT barrier ( $\text{kcal mol}^{-1}$ ) |             | $\Delta E$ ( $\text{kcal mol}^{-1}$ ) |             |
|---------------|---------------------------------|-------------|---------------------|---------------------------------------|-------------|---------------------------------------|-------------|
|               | $S_0$ state                     | $S_1$ state | $\Delta\tilde{\nu}$ | $S_0$ state                           | $S_1$ state | $S_0$ state                           | $S_1$ state |
| <b>HPITPA</b> | 3196                            | 2663        | 533                 | 10.58                                 | 1.48        | 0.47                                  | -0.14       |
| <b>HPIPXZ</b> | 3185                            | 2999        | 186                 | 10.03                                 | 4.99        | 0.44                                  | 0.18        |
| <b>HPIMAC</b> | 3175                            | 3005        | 170                 | 10.09                                 | 4.91        | 0.46                                  | 0.04        |

**Table S3** The intramolecular hydrogen-bonded distances (R1 and R2), the important distances between heavy atoms ( $\text{\AA}$ ), and dihedral angle ( $^\circ$ ) of the compounds (enol form) in the gas phase computed at  $S_0$  and  $S_1$  optimized geometries computed at B3LYP/6-31G(d) and TD-B3LYP/6-31G(d) levels of **HPIPXZ**, **HPIMAC**, and **HPITPA**.

| Compd         | $S_0$ state         |                     |                                 |                       | $S_1$ state         |                     |                                 |                       | $\Delta R1^a$ | $\Delta R2^b$ |
|---------------|---------------------|---------------------|---------------------------------|-----------------------|---------------------|---------------------|---------------------------------|-----------------------|---------------|---------------|
|               | R1 ( $\text{\AA}$ ) | R2 ( $\text{\AA}$ ) | O1 $\cdots$ N1 ( $\text{\AA}$ ) | N1C1C2C3 ( $^\circ$ ) | R1 ( $\text{\AA}$ ) | R2 ( $\text{\AA}$ ) | O1 $\cdots$ N1 ( $\text{\AA}$ ) | N1C1C2C3 ( $^\circ$ ) |               |               |
| <b>HPITPA</b> | 0.997               | 1.696               | 2.591                           | 12.9                  | 1.026               | 1.588               | 2.530                           | 14.3                  | 0.029         | 0.108         |
| <b>HPIPXZ</b> | 0.997               | 1.696               | 2.592                           | 13.4                  | 1.007               | 1.652               | 2.571                           | 15.6                  | 0.010         | 0.044         |
| <b>HPIMAC</b> | 0.998               | 1.690               | 2.586                           | 11.5                  | 1.006               | 1.654               | 2.572                           | 15.8                  | 0.008         | 0.036         |

<sup>a</sup>  $\Delta R1 = |R1 \text{ of } S_1 \text{ state} - R1 \text{ of } S_0 \text{ state}|$ ,  $\Delta R1$  of all compounds are positive values. <sup>b</sup>  $\Delta R2 = |R2 \text{ of } S_1 \text{ state} - R2 \text{ of } S_0 \text{ state}|$ ,  $\Delta R2$  of all compounds are negative values.

**Table S4** Simulated enol absorption, keto emission, oscillator strength ( $f$ ), molecular orbitals (MOs) contribution, and Stokes shifts by TD-B3LYP/6-31G(d) level of **HPIPXZ**, **HPIMAC**, and **HPITPA**.

| Compd         | Absorption                  |                             |                                 | Emission                   |                             |                            | Stokes shift (nm) |
|---------------|-----------------------------|-----------------------------|---------------------------------|----------------------------|-----------------------------|----------------------------|-------------------|
|               | Enol form                   |                             |                                 | Enol form                  |                             | Keto form                  |                   |
|               | $\lambda_{\text{abs}}$ (nm) | Ossillator strength ( $f$ ) | MOs Contribution                | $\lambda_{\text{em}}$ (nm) | Ossillator strength ( $f$ ) | $\lambda_{\text{em}}$ (nm) |                   |
| <b>HPITPA</b> | 340                         | 0.5653                      | HOMO-1 $\rightarrow$ LUMO (86%) | 376                        | 0.5220                      | 460                        | 120               |
| <b>HPIPXZ</b> | 347                         | 0.5263                      | HOMO-1 $\rightarrow$ LUMO (88%) | 394                        | 0.4415                      | 482                        | 135               |
| <b>HPIMAC</b> | 347                         | 0.5212                      | HOMO-1 $\rightarrow$ LUMO (88%) | 394                        | 0.4343                      | 491                        | 44                |

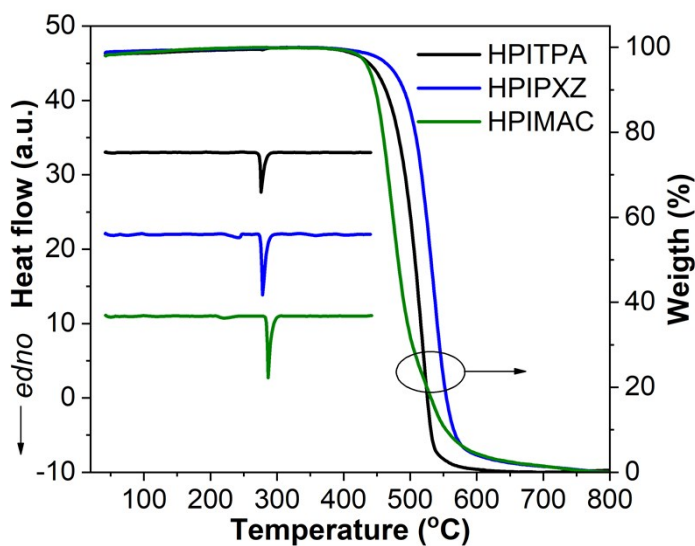

**Fig. S9** TGA and DSC traces of **HPIPXZ**, **HPIMAC**, and **HPITPA** measured at a heating rate of  $10\text{ }^{\circ}\text{C min}^{-1}$  under  $\text{N}_2$  flow.

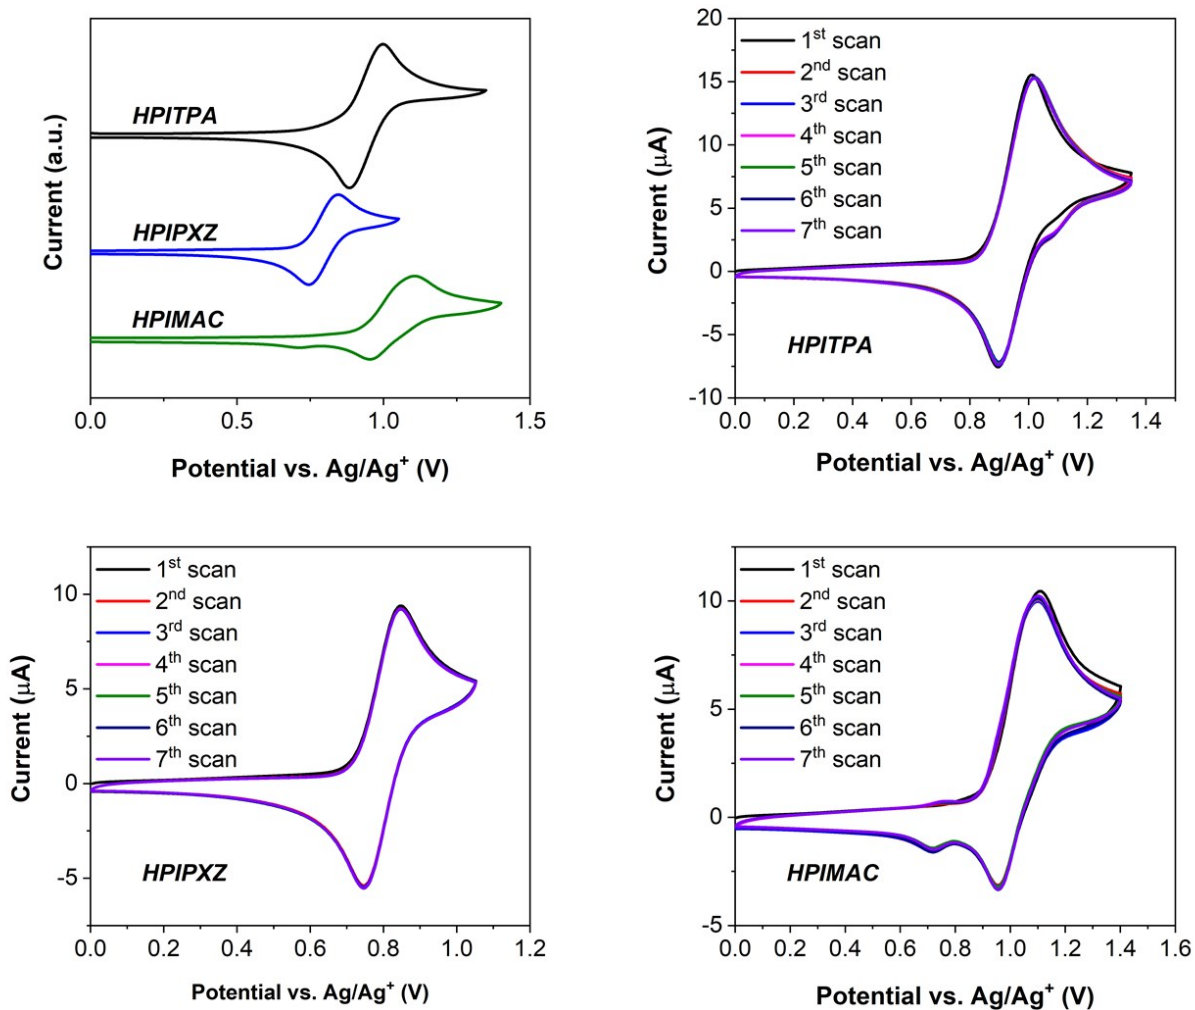

**Fig. S10** CV plots of HPI derivatives and their related multiple scan traces measured in dry  $\text{CH}_2\text{Cl}_2$  containing  $n\text{-Bu}_4\text{NPF}_6$  as a supporting electrolyte at a scan rate of  $50 \text{ mV s}^{-1}$  under Ar atmosphere.

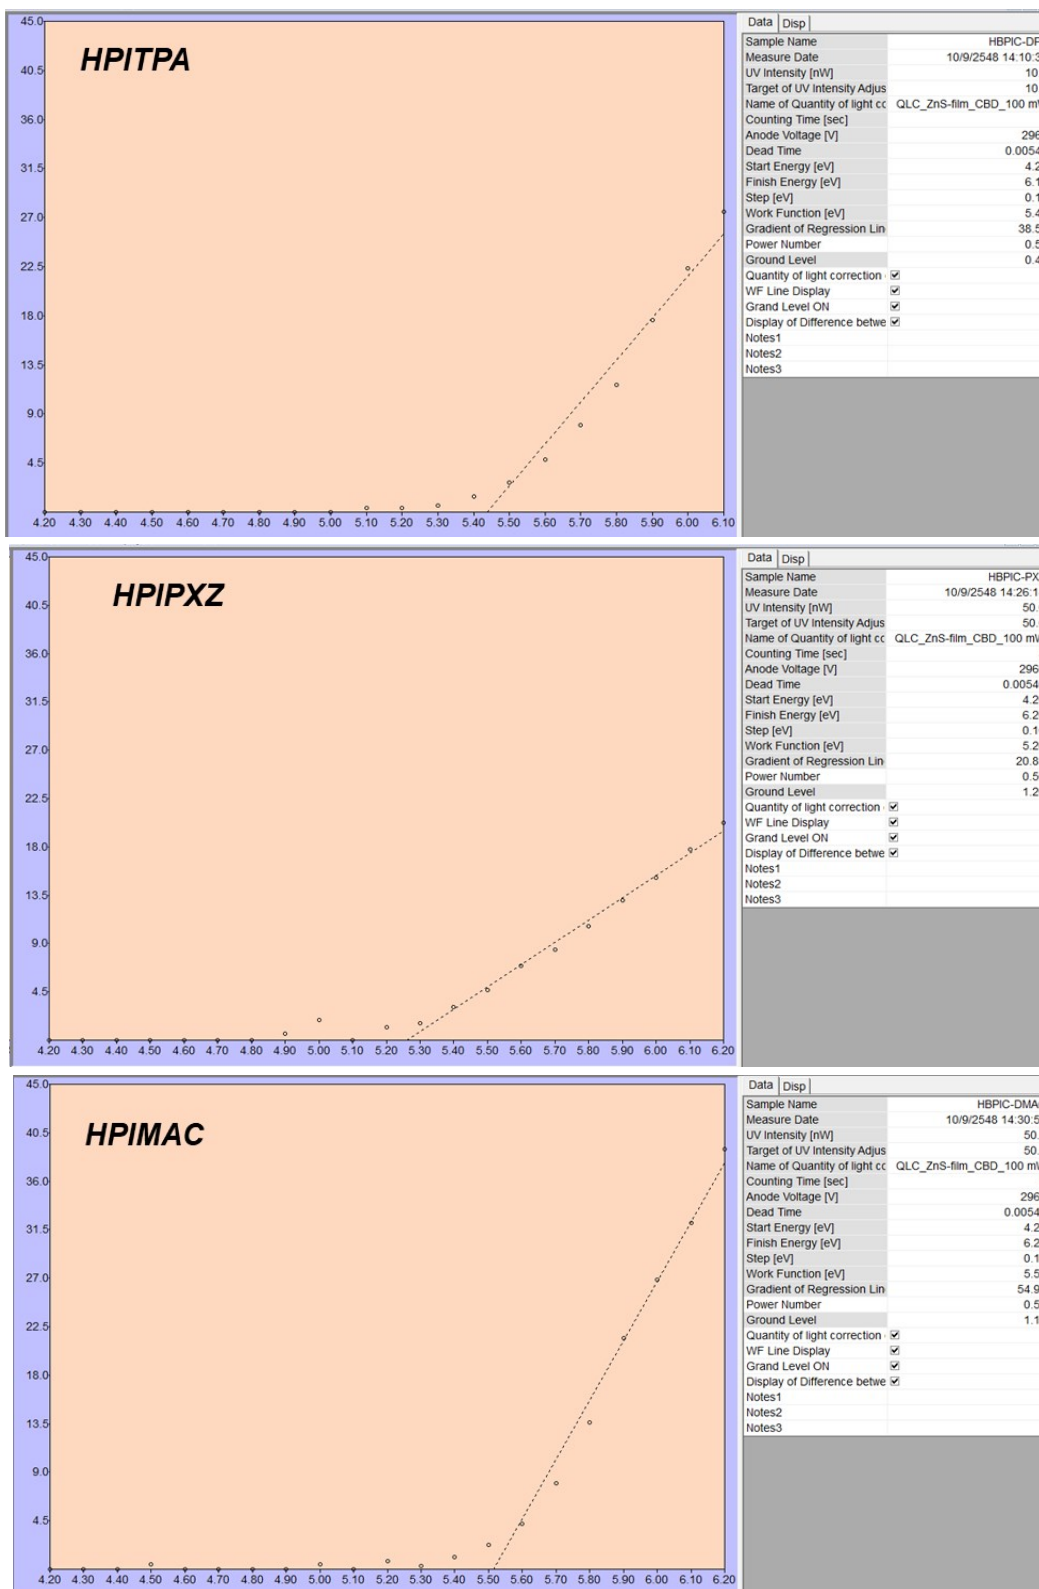

**Fig. S11** CV Photoemission yield spectroscopy in air (PYSA) spectra of **HPIPXZ**, **HPIMAC**, and **HPITPA**.

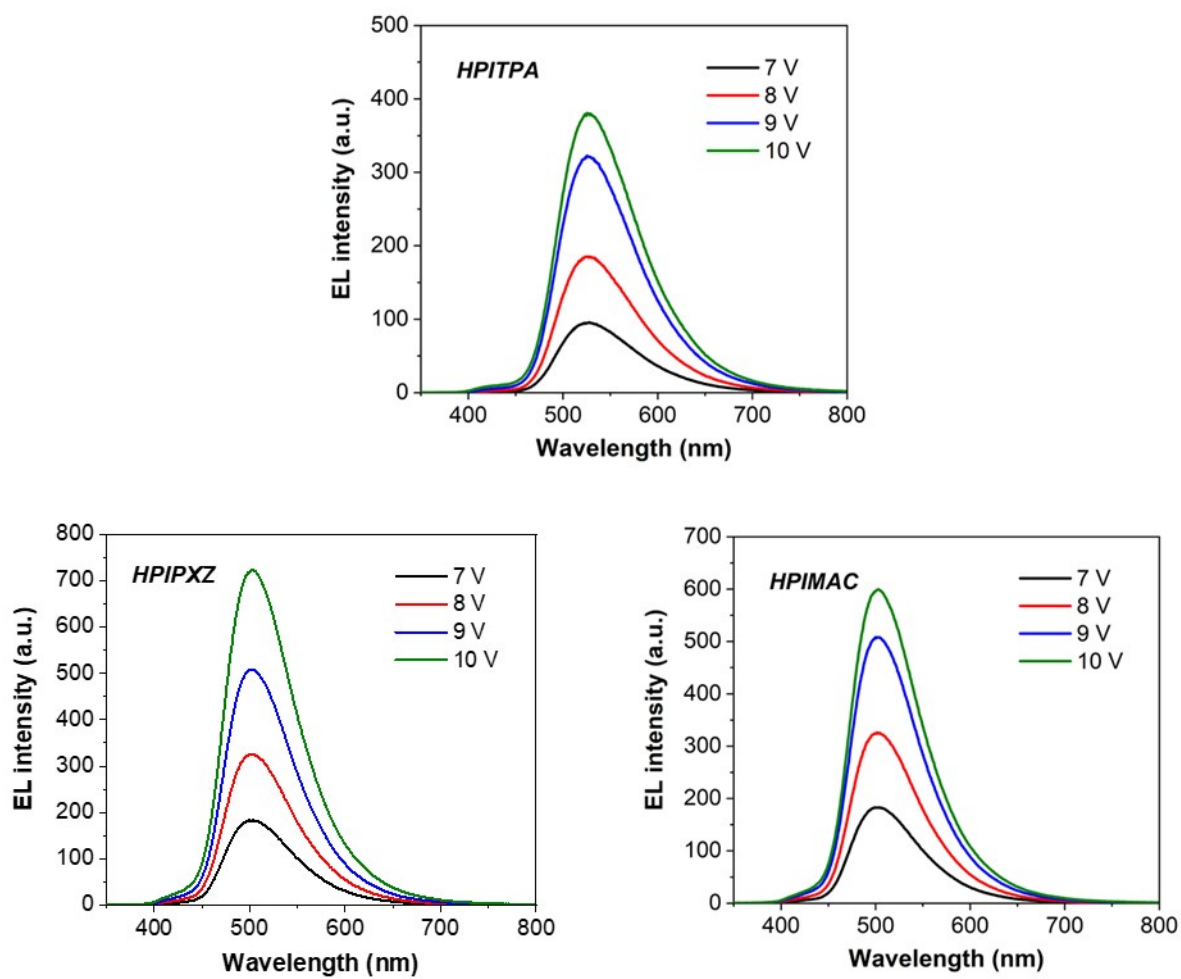

**Fig. S12** EL spectra of **HPIPXZ**, **HPIMAC**, and **HPITPA** based doped OLEDs at different applied voltages.
